# Supplementary material for: Nickel catalyzed alkylation of N-aromatic heterocycles with Grignard reagents through direct C–H bond functionalization
Source: Royal Society of Chemistry journal article supplement (doi:10.1039/c2cc32396f), 2012-01-01

## Supporting Information for

### Nickel catalyzed alkylation of N-aromatic heterocycles with Grignard reagents through direct C-H bond functionalization

Peng-Yang Xin,<sup>[a]</sup> Hong-Ying Niu,<sup>[b]</sup> Gui-Rong Qu,<sup>\*[a]</sup> Rui-Fang Ding,<sup>[a]</sup> and Hai-Ming Guo<sup>\*[a]</sup>

<sup>a</sup> College of Chemistry and Environmental Science, Key Laboratory of Green Chemical Media and Reactions of Ministry of Education, Henan Normal University, Xinxiang 453007, China.

<sup>b</sup> School of Chemistry and Chemical Engineering, Henan Institute of Science and Technology, Xinxiang 453003, China.

Telephone number: 86-373-3329255; Fax: 86-373-3329276; E-mail: [quguir@sina.com](mailto:quguir@sina.com); [guohm518@hotmail.com](mailto:guohm518@hotmail.com)

|                                                               |     |
|---------------------------------------------------------------|-----|
| General.....                                                  | S2  |
| Typical experiment procedure.....                             | S2  |
| Characterization of compounds.....                            | S3  |
| Copies of <sup>1</sup> H and <sup>13</sup> C NMR spectra..... | S11 |

## General:

Melting points were recorded with a micro melting point apparatus and uncorrected. NMR spectra were recorded with a 400 NMR spectrometer for  $^1\text{H}$ -NMR, 100 MHz for  $^{13}\text{C}$ -NMR. Proton chemical shifts  $\delta$  were given in ppm relative to tetramethylsilane (0.00 ppm) in  $\text{CDCl}_3$  or to the residual proton signals of the deuterated solvent  $\text{CD}_3\text{OD}$  (3.31 ppm). High resolution mass spectra were taken with a 3000 mass spectrometer, using Waters Q-TofMS/MS system. For column chromatography 200-300 mesh silica gel (GF254) was used as the stationary phase. All reactions were monitored by thin layer chromatography (TLC). All reactions were set up in air (with no use of a glove box) and carried out under nitrogen atmosphere.  $\text{Ni}(\text{dppp})\text{Cl}_2$  was purchased from commercial source and used as received. 1,2-Dichloroethane and THF were purified using standard methods before used. All other reagents were purchased from commercial sources and used as received.

**General procedure for the Ni-catalyzed direct  $\text{sp}^2$  C-H bond alkylation of N-aromatic heterocycles with Grignard reagents.** An oven-dried Schlenk tube containing a stirbar was charged with N-aromatic heterocycles (0.125 mmol) and  $\text{Ni}(\text{dppp})\text{Cl}_2$  (20 mol %). The Schlenk tube was fitted with a rubber cap, evacuated and back-filled with nitrogen (this sequence was repeated an additional two times). Then the 1,2-dichloroethane (0.03 mL, 3 equiv) was added to the tube along with THF (1 mL). The mixture was then stirred at room temperature. The Grignard reagent (8 equiv) was then added drop by drop via syringe and stirred for the corresponding reaction time at room temperature. After completion of the reaction, the mixture was then diluted with brine (3 mL) and extracted with ethyl acetate (3×3 mL). The organic layer was collected and dried over anhydrous  $\text{Na}_2\text{SO}_4$ , filtered and concentrated under reduced pressure. The crude material was purified by column chromatography on silica gel (eluting with petroleum ether/ethyl acetate mixtures) to give the desired products.

## Characterization of compounds

### 9-benzyl-8-cyclopentyl-6-methoxy-9H-purine (3a)

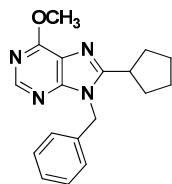

White solid. M.p. 45-47 °C.  $^1\text{H}$  NMR (400 MHz,  $\text{CDCl}_3$ )  $\delta$  8.51 (s, 1H), 7.30 (t,  $J$  = 6.4 Hz, 3H), 7.10 (d,  $J$  = 6 Hz, 2H), 5.47 (s, 2H), 4.19 (s, 3H), 3.20-3.12 (m, 1H), 2.03-1.96 (m, 2H), 1.94-1.81 (m, 4H), 1.62-1.58 (m, 2H).  $^{13}\text{C}$  NMR (100 MHz,  $\text{CDCl}_3$ )  $\delta$  160.0, 159.1, 151.3, 136.0, 128.9, 128.0, 126.6, 54.0, 45.8, 37.5, 32.1, 25.8. HRMS: calcd for  $\text{C}_{18}\text{H}_{21}\text{N}_4\text{O}$   $[\text{M}+\text{H}]^+$  309.1715, found 309.1717.

### 8-cyclopentyl-6-methoxy-9-methyl-9H-purine (3b)

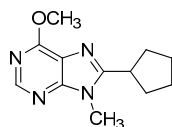

Colorless oil.  $^1\text{H}$  NMR (400 MHz,  $\text{CDCl}_3$ )  $\delta$  8.43 (s, 1H), 4.11 (2, 3H), 3.75 (s, 3H), 2.39-3.20 (m, 1H), 2.10-1.99 (m, 4H), 1.89-1.80 (m, 2H), 1.71-1.65 (m, 2H).  $^{13}\text{C}$  NMR (100 MHz,  $\text{CDCl}_3$ )  $\delta$  159.8, 158.7, 153.6, 150.9, 120.2, 53.9, 37.3, 31.3, 28.8, 25.7. HRMS: calcd for  $\text{C}_{12}\text{H}_{17}\text{N}_4\text{O}$   $[\text{M}+\text{H}]^+$  233.1402, found 233.1406.

### 8-cyclopentyl-9-ethyl-6-methoxy-9H-purine (3c)

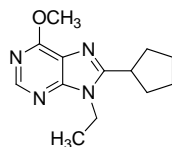

White solid. M.p. 53-55 °C.  $^1\text{H}$  NMR (400 MHz,  $\text{CDCl}_3$ )  $\delta$  8.44 (s, 1H), 4.25 (q,  $J$  = 7.2 Hz, 2H), 4.12 (s, 3H), 3.27-3.19 (m, 1H), 2.10-2.04 (m, 4H), 1.93-1.83 (m, 2H), 1.72-1.65 (m, 2H), 1.41 (t,  $J$  = 7.2 Hz, 3H).  $^{13}\text{C}$  NMR (100 MHz,  $\text{CDCl}_3$ )  $\delta$  159.8, 158.3, 153.0, 150.8, 120.5, 53.9, 37.7, 37.2, 32.2, 25.8, 15.5. HRMS: calcd for  $\text{C}_{13}\text{H}_{19}\text{N}_4\text{O}$   $[\text{M}+\text{H}]^+$  247.1559, found 247.1555.

### 8,9-dicyclopentyl-6-methoxy-9H-purine (3d)

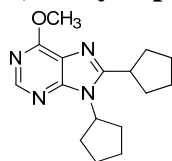

White solid. M.p. 115-116 °C.  $^1\text{H}$  NMR (400 MHz,  $\text{CDCl}_3$ )  $\delta$  8.41 (s, 1H), 4.77-4.70 (m, 1H), 4.12 (s, 3H), 4.30 (s, 3H), 3.32-3.24 (m, 1H), 2.47-2.40 (m, 2H), 2.10-2.00 (m, 8H), 1.90-1.80 (m, 2H), 1.74-1.66 (m, 4H).  $^{13}\text{C}$  NMR (100 MHz,  $\text{CDCl}_3$ )  $\delta$  159.9, 158.5, 153.2, 150.2, 120.9, 56.6, 53.7, 37.8, 31.9, 30.8, 25.8, 24.7. HRMS: calcd for  $\text{C}_{16}\text{H}_{23}\text{N}_4\text{O}$   $[\text{M}+\text{H}]^+$  287.1872, found 287.1873.

### 9-benzyl-6,8-dicyclopentyl-9H-purine (3e)

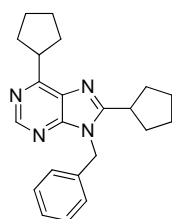

White solid. M.p. 61-62 °C.  $^1\text{H}$  NMR (400 MHz,  $\text{CDCl}_3$ )  $\delta$  8.83 (s, 1H), 7.29 (q,  $J$  = 7.6 Hz, 3H), 7.12 (d,  $J$  = 6.8 Hz, 2H), 5.45 (s, 2H), 4.13 (s, 3H), 3.94-3.85 (m, 1H), 3.21-3.13 (m, 1H), 2.16-2.13 (m, 2H), 2.06-1.83 (m, 10H), 1.77-1.784 (m, 2H), 1.70-1.61 (m, 2H).  $^{13}\text{C}$  NMR (100 MHz,  $\text{CDCl}_3$ )  $\delta$  164.3, 160.1, 152.3, 151.8, 136.0, 131.6, 128.9, 127.9, 126.7, 45.5, 42.0, 37.7, 32.9, 32.1, 26.4, 25.7. HRMS: calcd for  $\text{C}_{22}\text{H}_{27}\text{N}_4$   $[\text{M}+\text{H}]^+$  347.2236, found 347.2232.

### 9-benzyl-8-cyclopentyl-6-(4-ethylphenyl)-9H-purine (3f)

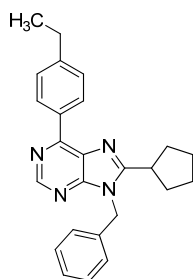

White solid. M.p. 175-177 °C.  $^1\text{H}$  NMR (400 MHz,  $\text{CDCl}_3$ )  $\delta$  8.95 (s, 1H), 8.82 (d,  $J$  = 8 Hz, 2H), 7.40 (d,  $J$  = 8.4 Hz, 2H), 7.32-7.27 (m, 3H), 7.13 (d,  $J$  = 6.8 Hz, 2H), 5.51 (s, 2H), 3.27-3.19 (m, 1H), 2.74 (q,  $J$  = 7.6 Hz, 2H), 2.11-2.02 (m, 2H), 1.97-1.90 (m, 4H), 1.71-1.65 (m, 2H), 1.30 (t,  $J$  = 7.6 Hz, 3H).  $^{13}\text{C}$  NMR (100 MHz,  $\text{CDCl}_3$ )  $\delta$

161.1, 154.2, 152.8, 151.6, 147.1, 136.0, 133.6, 130.2, 129.8, 128.9, 128.1, 128.0, 126.7, 45.5, 37.6, 32.1, 29.0, 25.9, 15.4. HRMS: calcd for  $C_{25}H_{27}N_4$   $[M+H]^+$  383.2236, found 383.2232.

**9-benzyl-6-methoxy-8-pentyl-9H-purine (3g)**

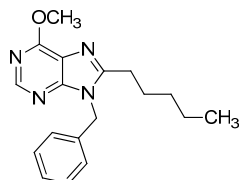

Yellow oil.  $^1H$  NMR (400 MHz,  $CDCl_3$ )  $\delta$  8.49 (s, 1H), 7.30-7.22 (m, 3H), 7.09 (t,  $J = 6.4$  Hz, 2H), 5.40 (s, 2H), 4.15 (s, 3H), 2.72 (t,  $J = 8$  Hz, 2H), 1.79-1.71 (m, 2H), 1.32-1.24 (m, 4H), 0.82 (t,  $J = 7.2$  Hz, 3H).  $^{13}C$  NMR (100 MHz,  $CDCl_3$ )  $\delta$  160.0, 155.3, 153.4, 151.4, 135.7, 128.9, 128.0, 126.8, 120.4, 54.0, 45.9, 31.5, 27.9, 26.7, 22.3, 13.9. HRMS: calcd for  $C_{18}H_{23}N_4O$   $[M+H]^+$  311.1872, found 311.1871.

**9-benzyl-8-cyclopropyl-6-methoxy-9H-purine (3h)**

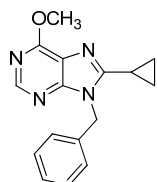

Light yellow oil.  $^1H$  NMR (400 MHz,  $CDCl_3$ )  $\delta$  8.50 (s, 1H), 7.34-7.30 (m, 3H), 7.19 (d,  $J = 6.4$  Hz, 2H), 5.54 (s, 2H), 4.17 (s, 2H), 1.94-1.88 (m, 1H), 1.28-1.24 (m, 2H), 1.04-0.99 (m, 2H).  $^{13}C$  NMR (100 MHz,  $CDCl_3$ )  $\delta$  159.8, 156.7, 151.1, 135.9, 128.9, 128.0, 126.9, 54.0, 45.8, 8.9, 8.2. HRMS: calcd for  $C_{16}H_{17}N_4O$   $[M+H]^+$  281.1402, found 281.1405.

**9-benzyl-8-cyclohexyl-6-methoxy-9H-purine (3i)**

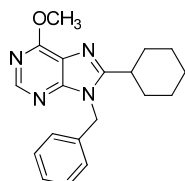

Light yellow oil.  $^1H$  NMR (400 MHz,  $CDCl_3$ )  $\delta$  8.51 (s, 1H), 7.29 (d,  $J = 7.2$  Hz, 3H), 7.11 (d,  $J = 6.4$  Hz, 2H), 5.44 (s, 2H), 4.17 (s, 3H), 2.77-2.71 (m, 1H), 1.80-1.63 (m, 10H).  $^{13}C$  NMR (100 MHz,  $CDCl_3$ )  $\delta$  160.0, 159.2, 153.1, 151.3, 136.01, 128.9, 128.0,

126.7, 120.5, 54.0, 45.8, 36.8, 31.5, 26.1, 25.5. HRMS: calcd for  $C_{19}H_{23}N_4O$   $[M+H]^+$  323.1872, found 323.1874.

### 9-benzyl-8-ethyl-6-(4-ethylphenyl)-9H-purine (3j)

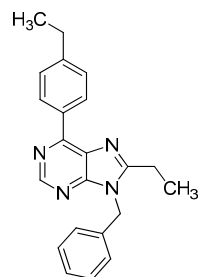

Light yellow solid. M.p. 110-112 °C.  $^1H$  NMR (400 MHz,  $CDCl_3$ )  $\delta$  8.96 (s, 1H), 8.76 (d,  $J = 8$  Hz, 2H), 7.39 (d,  $J = 8.4$  Hz, 2H), 7.36-7.30 (m, 3H), 7.16 (d,  $J = 6.8$  Hz, 2H), 5.48 (s, 3H), 2.87 (q,  $J = 7.2$  Hz, 2H), 2.74 (q,  $J = 7.6$  Hz, 2H), 1.40 (t,  $J = 7.2$  Hz, 3H), 1.29 (t,  $J = 7.6$  Hz, 3H).  $^{13}C$  NMR (100 MHz,  $CDCl_3$ )  $\delta$  158.1, 154.0, 153.1, 151.8, 147.2, 135.7, 133.4, 130.3, 129.7, 129.0, 128.2, 128.1, 126.9, 45.6, 29.0, 21.5, 15.4, 11.2. HRMS: calcd for  $C_{22}H_{23}N_4$   $[M+H]^+$  343.1923, found 343.1920.

### 1-benzyl-2-cyclopentyl-1H-benzoimidazole (5a)

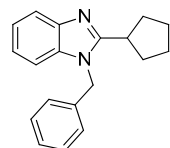

White solid. M.p. 82-84 °C.  $^1H$  NMR (400 MHz,  $CDCl_3$ )  $\delta$  7.78 (d,  $J = 8$  Hz, 1H), 7.30-7.28 (m, 3H), 7.24-7.21 (m, 1H), 7.18-7.17 (m, 2H), 7.03 (d,  $J = 6.4$  Hz, 2H), 5.38 (s, 2H), 3.25-3.17 (m, 1H), 2.11-2.02 (m, 4H), 1.93-1.89 (m, 2H), 1.67-1.64 (m, 2H).  $^{13}C$  NMR (100 MHz,  $CDCl_3$ )  $\delta$  159.1, 142.5, 136.3, 135.5, 128.9, 127.8, 126.0, 122.2, 121.9, 119.3, 109.4, 46.7, 37.3, 32.3, 25.8. HRMS: calcd for  $C_{19}H_{21}N_2$   $[M+H]^+$  277.1705, found 277.1701.

### 2-cyclopentyl-1-phenethyl-1H-benzoimidazole (5b)

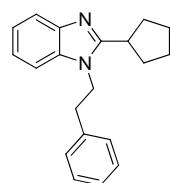

Light yellow oil.  $^1H$  NMR (400 MHz,  $CDCl_3$ )  $\delta$  7.77-7.75 (m, 1H), 7.33-7.31 (m, 3H),

7.27-7.23 (m, 3H), 7.05 (d,  $J = 6.4$  Hz, 2H), 4.36 (t,  $J = 7.4$  Hz, 2H), 3.09 (t,  $J = 7.4$  Hz, 2H), 2.92-2.83 (m, 1H), 1.95-1.85 (m, 6H), 1.67-1.61 (m, 2H).  $^{13}\text{C}$  NMR (100 MHz,  $\text{CDCl}_3$ )  $\delta$  158.9, 142.6, 137.8, 134.8, 128.8, 128.7, 127.0, 121.9, 121.8, 119.3, 109.1, 45.1, 36.9, 36.1, 32.3, 25.8. HRMS: calcd for  $\text{C}_{20}\text{H}_{23}\text{N}_2$   $[\text{M}+\text{H}]^+$  291.1861, found 291.1858.

### 2-cyclopentyl-1-methyl-1H-benzoimidazole (5c)

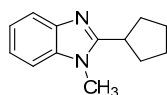

Light yellow oil.  $^1\text{H}$  NMR (400 MHz,  $\text{CDCl}_3$ )  $\delta$  7.75-7.73 (m, 1H), 7.30-7.28 (m, 1H), 7.24-7.20 (m, 2H), 3.75 (s, 3H), 3.34-3.25 (m, 1H), 2.14-2.04 (m, 4H), 1.95-1.88 (m, 2H), 1.76-1.71 (m, 2H).  $^{13}\text{C}$  NMR (100 MHz,  $\text{CDCl}_3$ )  $\delta$  158.8, 136.00, 121.9, 121.7, 119.2, 108.7, 37.2, 31.7, 29.7, 25.8. HRMS: calcd for  $\text{C}_{13}\text{H}_{17}\text{N}_2$   $[\text{M}+\text{H}]^+$  201.1392, found 201.1390.

### 2-cyclopentyl-1-pentyl-1H-benzoimidazole (5d)

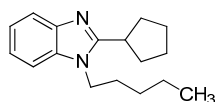

Colorless oil.  $^1\text{H}$  NMR (400 MHz,  $\text{CDCl}_3$ )  $\delta$  7.75-7.72 (m, 1H), 7.31-7.28 (m, 1H), 7.23-7.20 (m, 2H), 4.12 (t,  $J = 7.6$  Hz, 2H), 3.29-3.20 (m, 1H), 2.13-2.05 (m, 4H), 1.97-1.90 (m, 2H), 1.81 (t,  $J = 7.6$  Hz, 2H), 1.74-1.71 (m, 2H), 1.38 (t,  $J = 3.6$  Hz, 4H), 0.91 (t,  $J = 7$  Hz, 3H).  $^{13}\text{C}$  NMR (100 MHz,  $\text{CDCl}_3$ )  $\delta$  121.7, 121.6, 119.2, 109.2, 107.0, 43.6, 37.1, 32.6, 29.8, 29.1, 25.9, 22.4, 13.9. HRMS: calcd for  $\text{C}_{17}\text{H}_{25}\text{N}_2$   $[\text{M}+\text{H}]^+$  257.2018, found 257.2016.

### 1-benzyl-2-cyclopropyl-1H-benzoimidazole (5e)

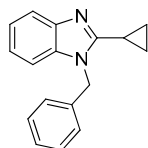

Light yellow oil.  $^1\text{H}$  NMR (400 MHz,  $\text{CDCl}_3$ )  $\delta$  7.71 (d,  $J = 8.8$  Hz, 1H), 7.33-7.27 (m,

3H), 7.24-7.17 (m, 3H), 7.11 (d,  $J = 6.8$  Hz, 2H), 5.45 (s, 2H), 1.96-1.90 (m, 1H), 1.26-1.22 (m, 2H), 1.07-1.02 (m, 2H).  $^{13}\text{C}$  NMR (100 MHz,  $\text{CDCl}_3$ )  $\delta$  156.7, 142.4, 136.2, 135.7, 128.9, 127.8, 126.3, 122.0, 119.0, 109.1, 46.8, 8.2, 7.7. HRMS: calcd for  $\text{C}_{17}\text{H}_{17}\text{N}_2$   $[\text{M}+\text{H}]^+$  249.1392, found 249.1389.

### 1-benzyl-2-cyclohexyl-1H-benzoimidazole (5f)

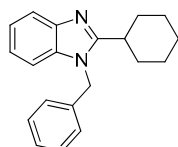

White solid. M.p. 79-81 °C.  $^1\text{H}$  NMR (400 MHz,  $\text{CDCl}_3$ )  $\delta$  7.79 (d,  $J = 7.6$  Hz, 1H), 7.32-7.28 (m, 3H), 7.25-7.21 (m, 1H), 7.17 (d,  $J = 3.6$  Hz, 2H), 7.04 (d,  $J = 6.4$  Hz, 2H), 5.36 (s, 2H), 2.83-2.76 (m, 1H), 1.90-1.73 (m, 8H), 1.37-1.30 (m, 2H).  $^{13}\text{C}$  NMR (100 MHz,  $\text{CDCl}_3$ )  $\delta$  159.3, 142.7, 136.3, 135.0, 129.0, 127.8, 126.1, 122.2, 121.9, 119.3, 109.6, 46.7, 36.4, 31.9, 26.3, 25.7. HRMS: calcd for  $\text{C}_{20}\text{H}_{23}\text{N}_2$   $[\text{M}+\text{H}]^+$  291.1861, found 291.1865.

### 1-benzyl-2-pentyl-1H-benzoimidazole (5g)

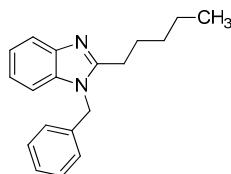

Colorless oil.  $^1\text{H}$  NMR (400 MHz,  $\text{CDCl}_3$ )  $\delta$  7.77 (d,  $J = 7.6$  Hz, 1H), 7.31-7.18 (m, 6H), 7.03 (d,  $J = 6.4$  Hz, 2H), 5.32 (s, 2H), 2.82 (t,  $J = 8$  Hz, 2H), 1.86-1.79 (m, 2H), 1.38-1.29 (m, 4H), 0.86 (t,  $J = 7$  Hz, 3H).  $^{13}\text{C}$  NMR (100 MHz,  $\text{CDCl}_3$ )  $\delta$  155.5, 142.6, 136.1, 135.4, 128.9, 127.8, 126.1, 122.2, 121.9, 119.2, 109.4, 46.9, 31.6, 27.6, 27.4, 22.4, 14.0. HRMS: calcd for  $\text{C}_{19}\text{H}_{23}\text{N}_2$   $[\text{M}+\text{H}]^+$  279.1861, found 279.1859.

### 1,2-dibenzyl-1H-benzoimidazole (5h)

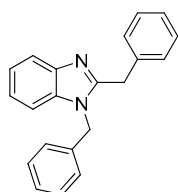



White solid. M.p. 139-141 °C.  $^1\text{H}$  NMR (400 MHz,  $\text{CDCl}_3$ )  $\delta$  7.82 (d,  $J = 7.6$  Hz, 1H), 7.29-7.20 (m, 11H), 6.93 (d,  $J = 3.6$  Hz, 2H), 5.19 (s, 2H), 4.26 (s, 2H).  $^{13}\text{C}$  NMR (100 MHz,  $\text{CDCl}_3$ )  $\delta$  153.4, 142.6, 136.1, 135.8, 128.9, 128.8, 128.5, 127.8, 127.0, 126.2, 122.6, 122.1, 119.6, 109.6, 47.1, 34.6. HRMS: calcd for  $\text{C}_{21}\text{H}_{19}\text{N}_2$   $[\text{M}+\text{H}]^+$  299.1548, found 299.1544.

### 1-benzyl-2-isopropyl-1H-benzoimidazole (5i)

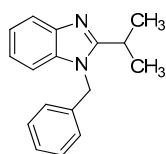

Colorless oil.  $^1\text{H}$  NMR (400 MHz,  $\text{CDCl}_3$ )  $\delta$  7.80 (d,  $J = 8$  Hz, 1H), 7.32-7.28 (m, 3H), 7.24-7.20 (m, 3H), 7.03 (d,  $J = 6.8$  Hz, 2H), 5.38 (s, 2H), 3.19-3.13 (m, 1H), 1.40 (s, 3H), 1.38 (s, 3H).  $^{13}\text{C}$  NMR (100 MHz,  $\text{CDCl}_3$ )  $\delta$  160.1, 142.5, 136.2, 135.2, 129.0, 127.8, 126.0, 122.3, 122.0, 119.4, 109.5, 46.7, 26.6, 21.7. HRMS: calcd for  $\text{C}_{17}\text{H}_{19}\text{N}_2$   $[\text{M}+\text{H}]^+$  251.1548, found 251.1552.

### 1-benzyl-2-propyl-1H-benzoimidazole (5j)

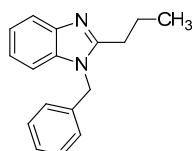

Colorless oil.  $^1\text{H}$  NMR (400 MHz,  $\text{CDCl}_3$ )  $\delta$  7.77 (d,  $J = 7.6$  Hz, 1H), 7.30-7.18 (m, 6H), 7.04 (d,  $J = 6.4$  Hz, 2H), 5.34 (s, 2H), 2.82 (t,  $J = 7.6$  Hz, 1H), 1.91-1.82 (m, 2H), 1.01 (t,  $J = 7.2$  Hz, 3H).  $^{13}\text{C}$  NMR (100 MHz,  $\text{CDCl}_3$ )  $\delta$  155.3, 142.6, 136.0, 135.3, 129.0, 127.8, 126.1, 122.2, 122.0, 119.2, 109.5, 46.9, 29.5, 21.1, 14.0. HRMS: calcd for  $\text{C}_{17}\text{H}_{19}\text{N}_2$   $[\text{M}+\text{H}]^+$  251.1548, found 251.1550.

### 2-cyclopentylbenzothiazole (7)

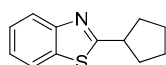

Yellow oil.  $^1\text{H}$  NMR (400 MHz,  $\text{CDCl}_3$ )  $\delta$  7.96 (d,  $J = 8$  Hz, 1H), 7.84 (d,  $J = 8$  Hz, 1H), 7.44 (t,  $J = 7.8$  Hz, 1H), 7.33 (t,  $J = 7.6$  Hz, 3H), 3.59-3.51 (m, 1H), 2.30-2.23 (m, 2H), 1.99-1.86 (m, 4H), 1.77-1.73 (m, 2H).  $^{13}\text{C}$  NMR (100 MHz,  $\text{CDCl}_3$ )  $\delta$  177.2,

153.2, 134.8, 125.8, 124.5, 122.5, 121.5, 44.8, 34.1, 25.6. HRMS: calcd for C<sub>12</sub>H<sub>14</sub>NS  
[M+H]<sup>+</sup> 204.0847, found 204.0849.

**1-benzyl-2-ethyl-1H-benzoimidazole (5k)**

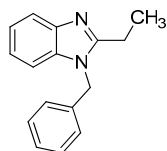

Colorless oil. <sup>1</sup>H NMR (400 MHz, CDCl<sub>3</sub>) δ 7.78 (d, *J* = 7.6 Hz, 1H), 7.32-7.18 (m, 6H), 7.04 (d, *J* = 6.8 Hz, 2H), 5.34 (s, 2H), 2.86 (q, *J* = 7.6 Hz, 2H), 1.41 (t, *J* = 7.6 Hz, 3H). <sup>13</sup>C NMR (100 MHz, CDCl<sub>3</sub>) δ 156.3, 142.4, 135.9, 135.4, 129.0, 127.9, 126.1, 122.3, 122.0, 119.2, 109.4, 46.8, 20.9, 11.7. HRMS: calcd for C<sub>16</sub>H<sub>17</sub>N<sub>2</sub>  
[M+H]<sup>+</sup> 237.1392, found 237.1389.

### Copies of $^1\text{H}$ and $^{13}\text{C}$ NMR spectra

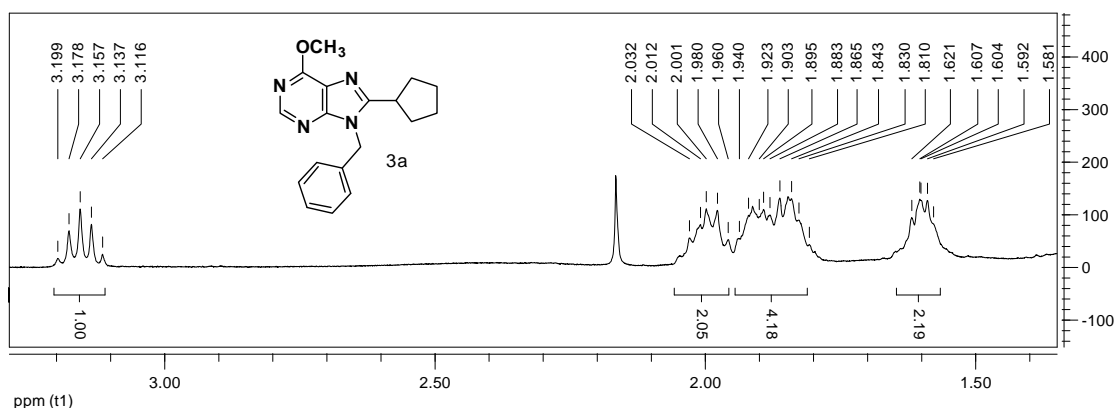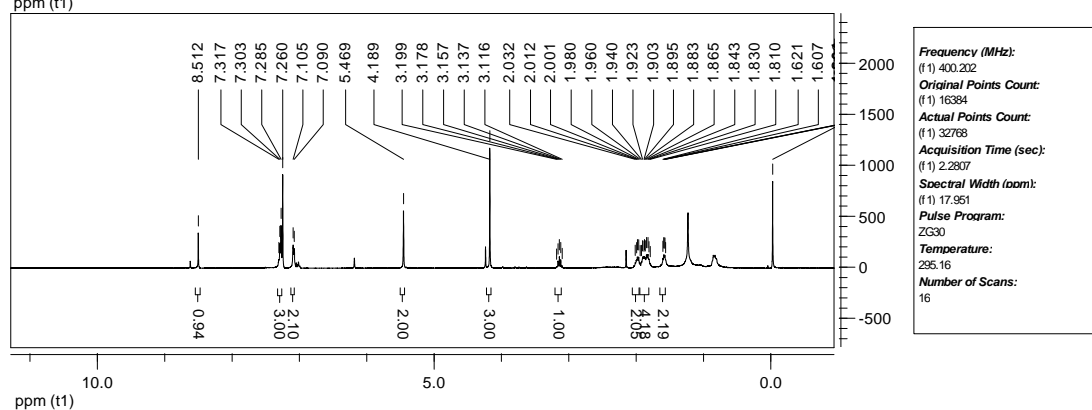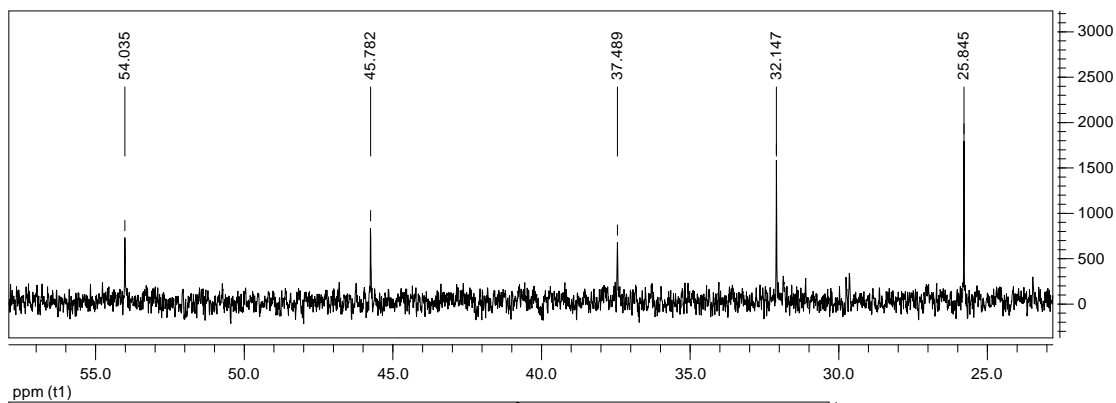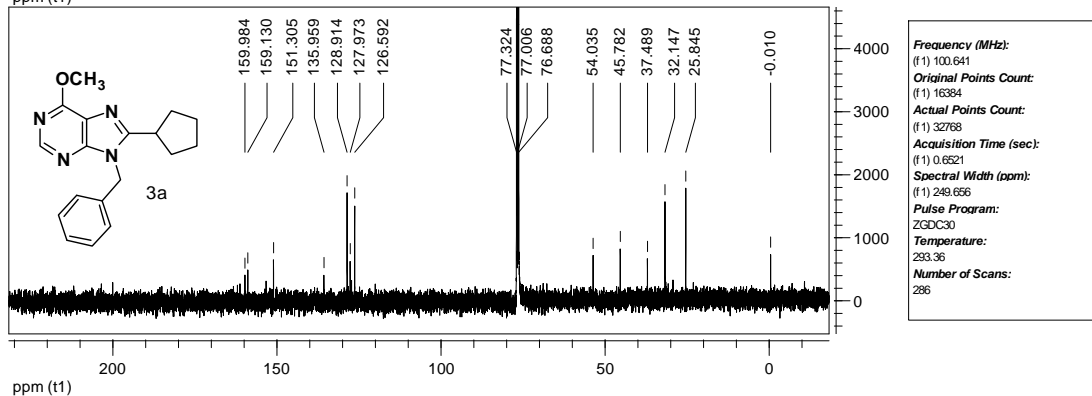

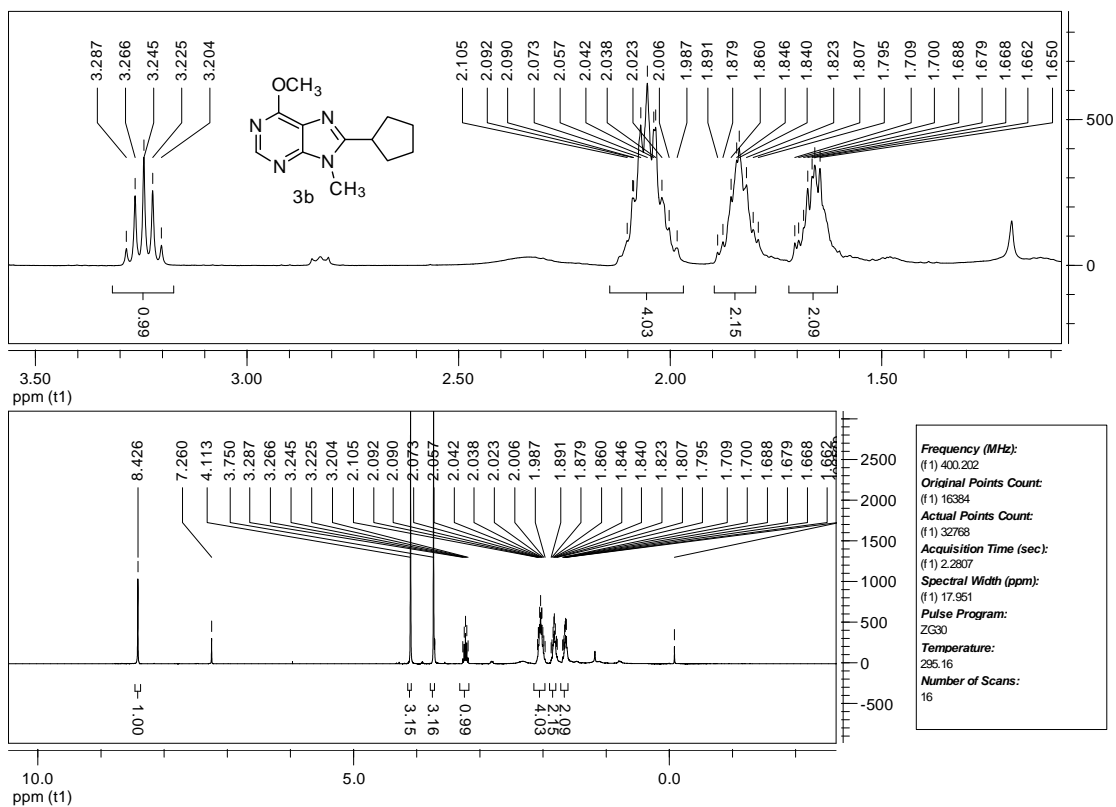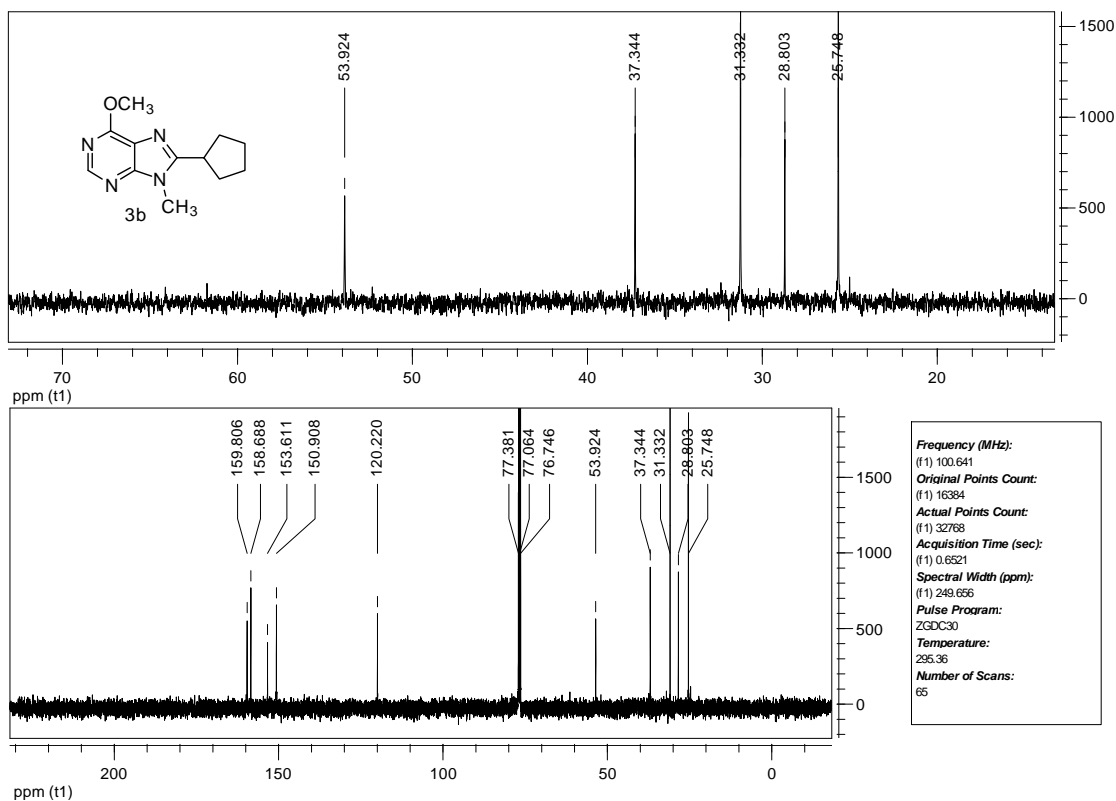

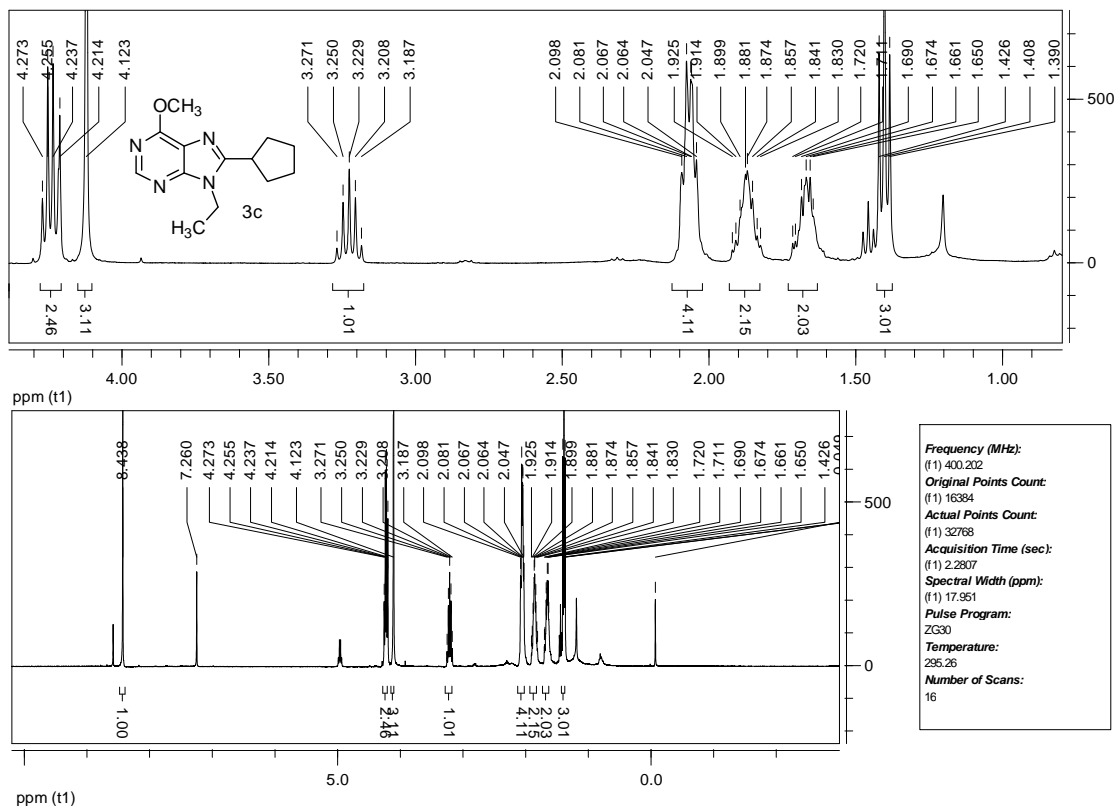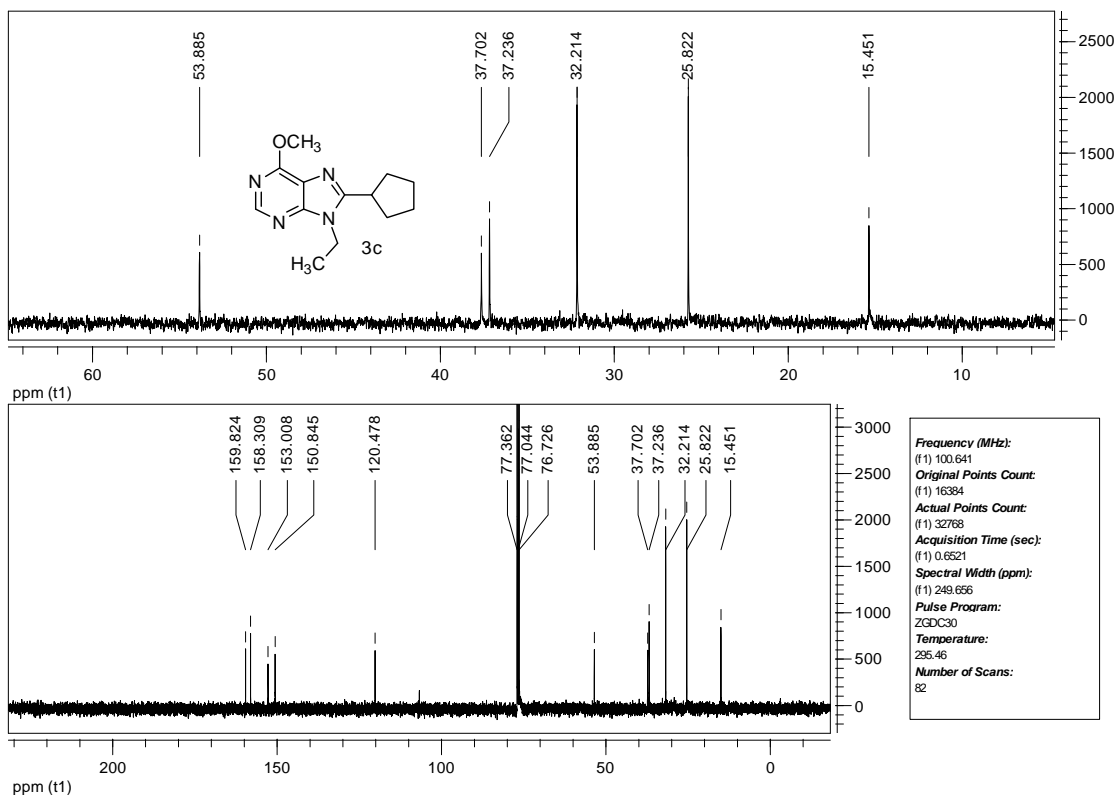

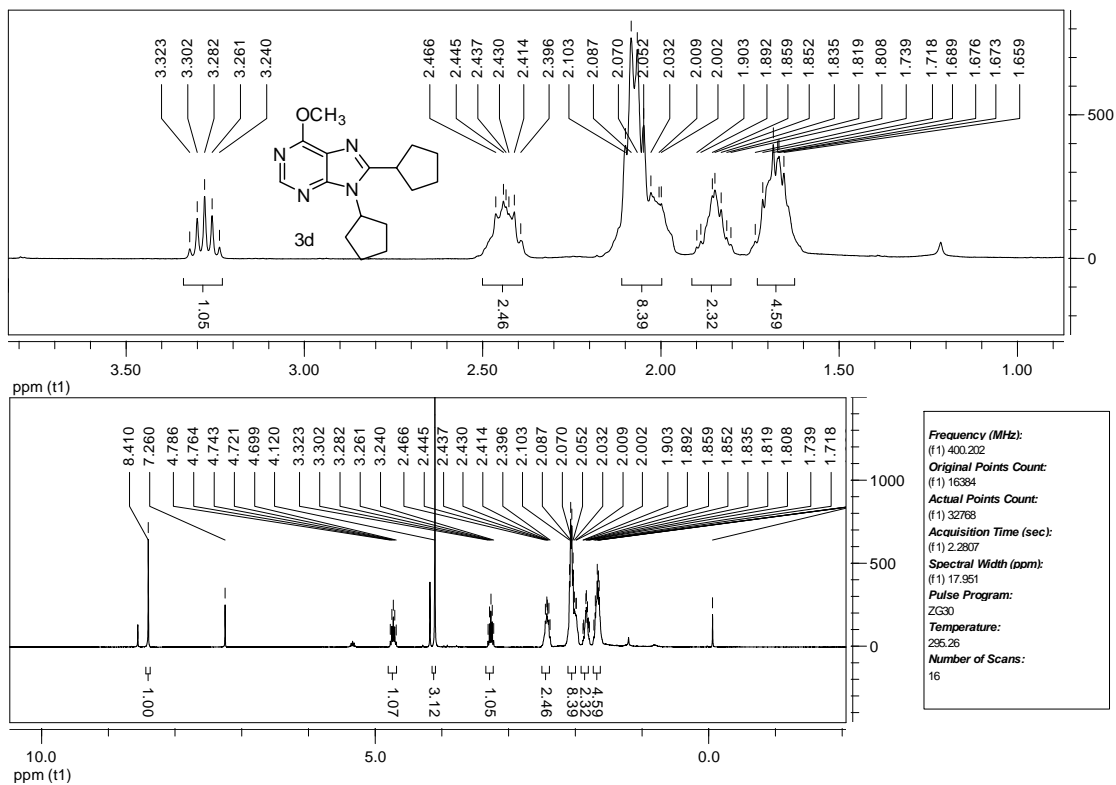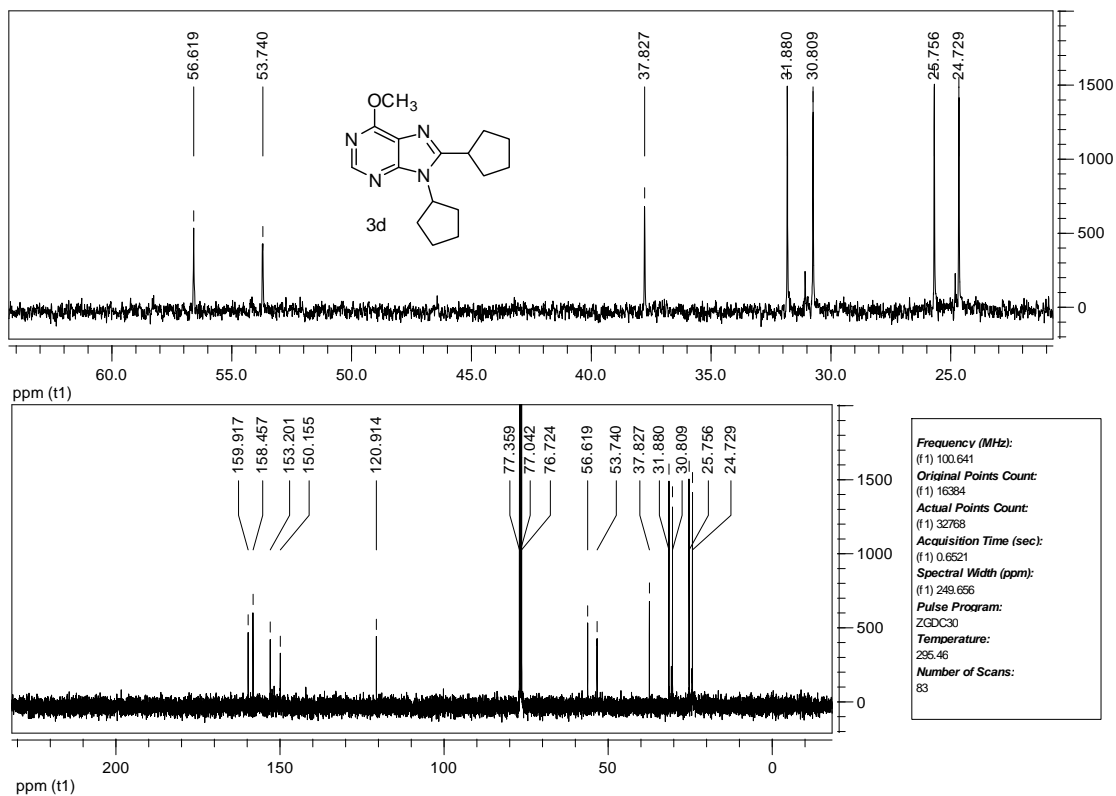

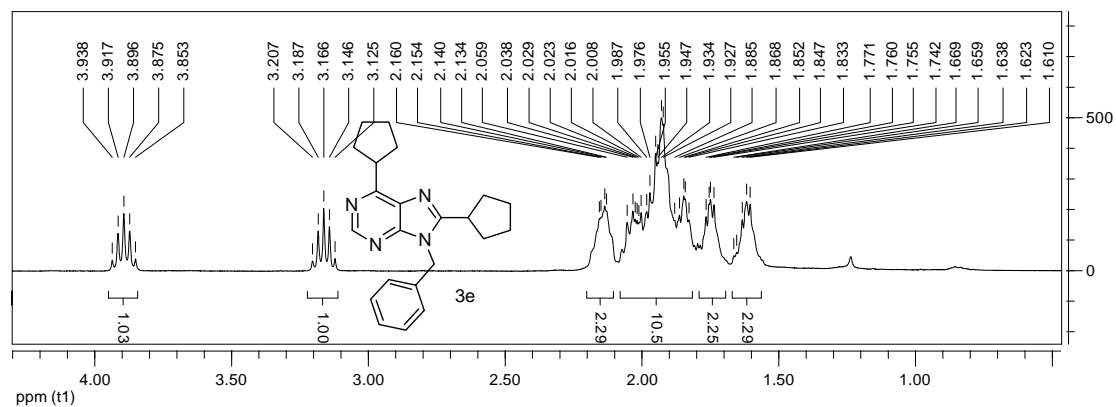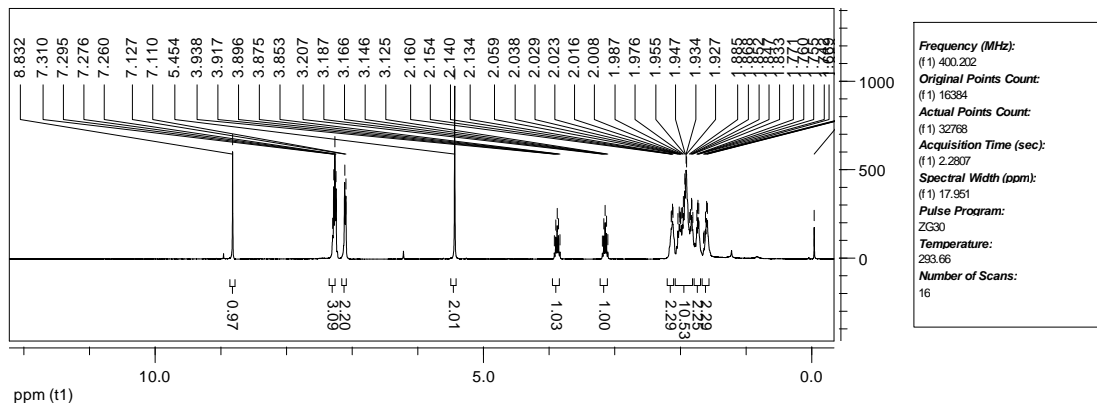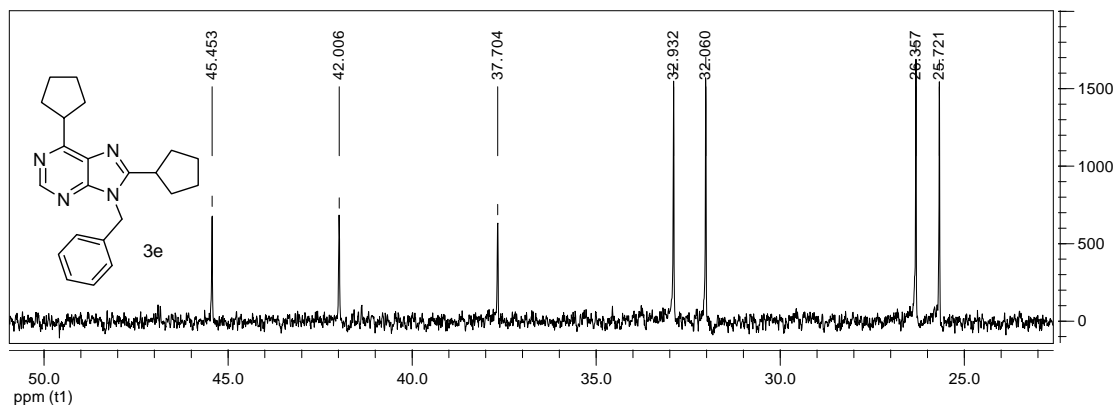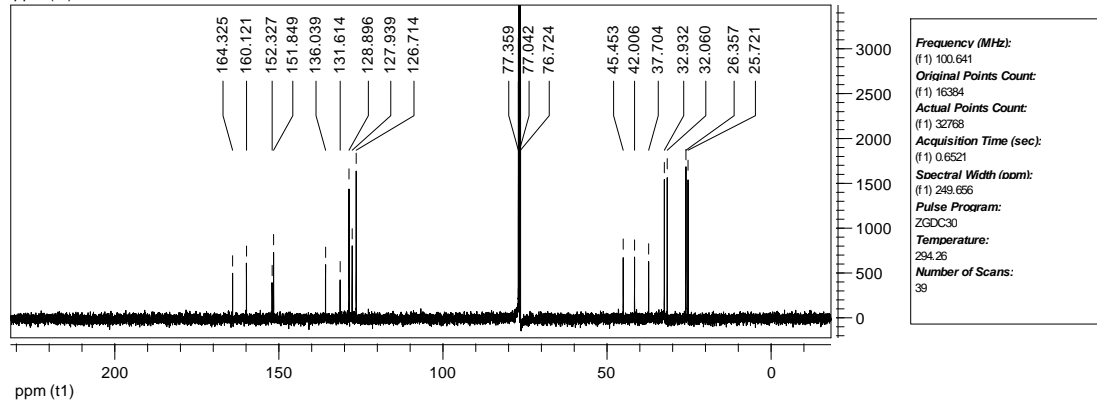

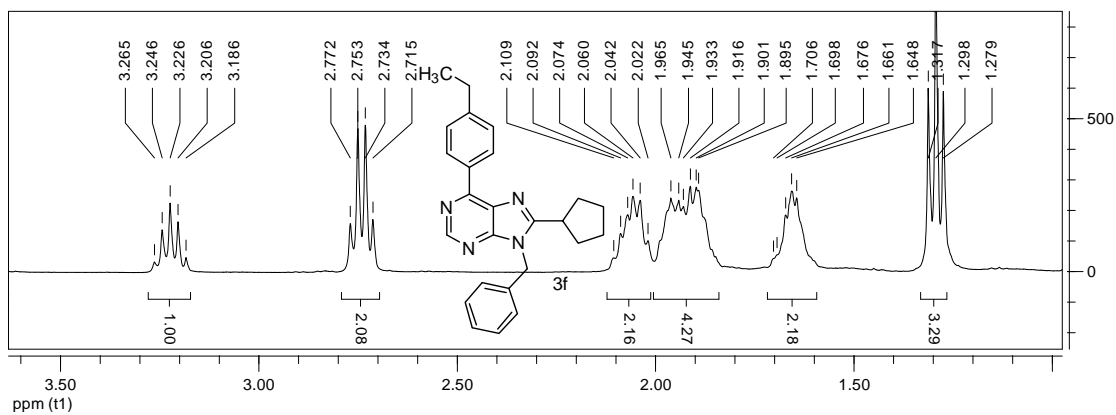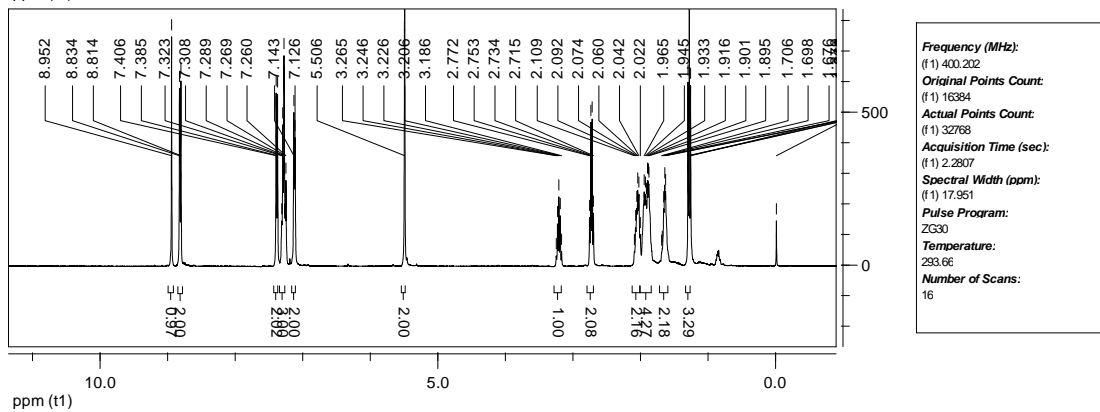

Frequency (MHz):  
 (f1) 400.202  
 Original Points Count:  
 (f1) 16384  
 Actual Points Count:  
 (f1) 32768  
 Acquisition Time (sec):  
 (f1) 2.2807  
 Spectral Width (ppm):  
 (f1) 17.951  
 Pulse Program:  
 ZCS0  
 Temperature:  
 233.66  
 Number of Scans:  
 16

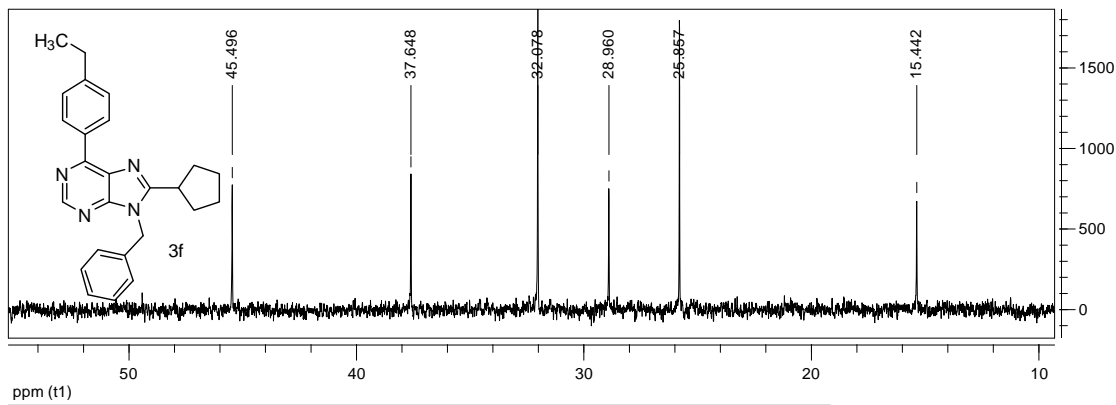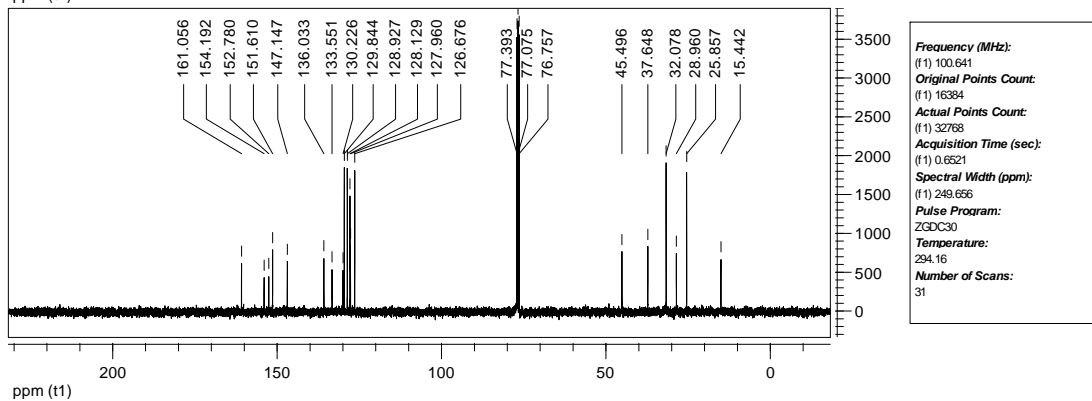

Frequency (MHz):  
 (f1) 100.641  
 Original Points Count:  
 (f1) 16384  
 Actual Points Count:  
 (f1) 32768  
 Acquisition Time (sec):  
 (f1) 0.6521  
 Spectral Width (ppm):  
 (f1) 249.656  
 Pulse Program:  
 ZGDC30  
 Temperature:  
 234.16  
 Number of Scans:  
 31



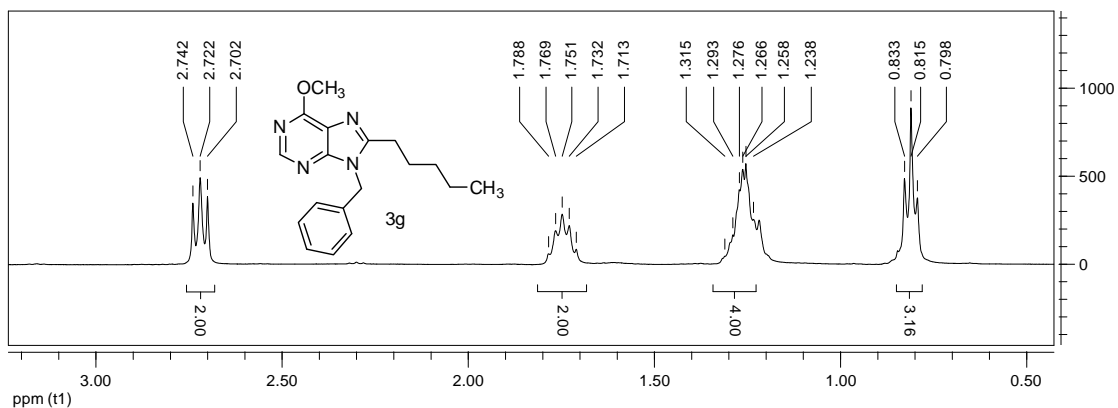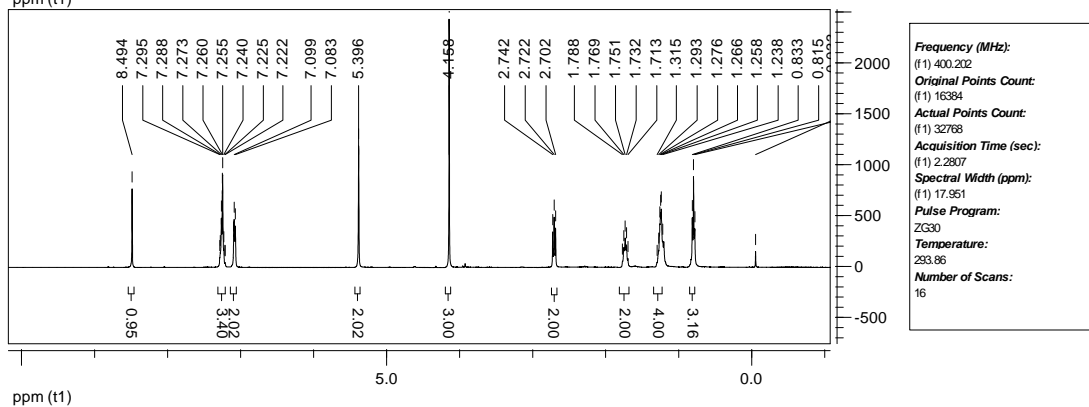

**Frequency (MHz):**  
 (f1) 400.202  
**Original Points Count:**  
 (f1) 16384  
**Actual Points Count:**  
 (f1) 32768  
**Acquisition Time (sec):**  
 (f1) 2.2807  
**Spectral Width (ppm):**  
 (f1) 17.951  
**Pulse Program:**  
 ZG30  
**Temperature:**  
 293.86  
**Number of Scans:**  
 16

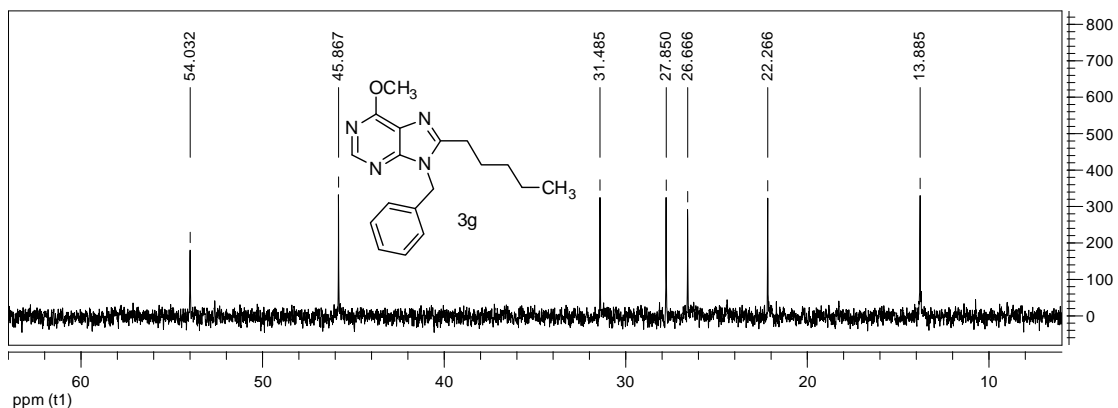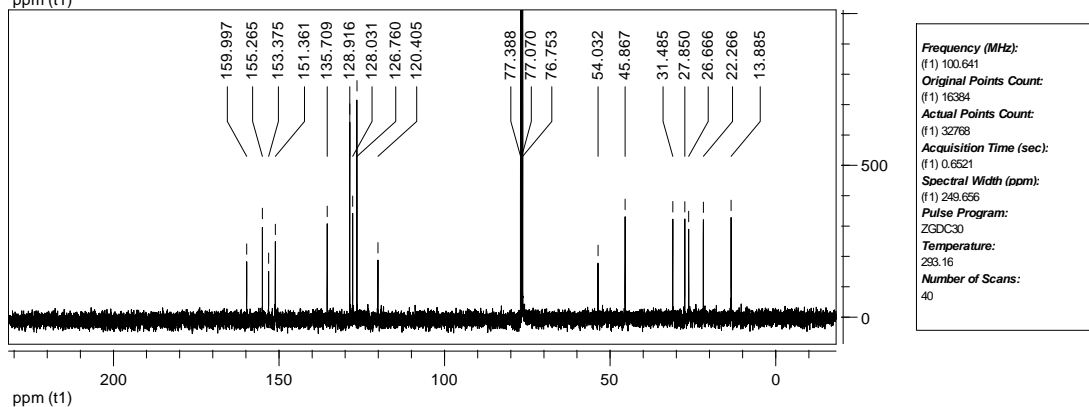

**Frequency (MHz):**  
 (f1) 100.641  
**Original Points Count:**  
 (f1) 16384  
**Actual Points Count:**  
 (f1) 32768  
**Acquisition Time (sec):**  
 (f1) 0.6521  
**Spectral Width (ppm):**  
 (f1) 249.656  
**Pulse Program:**  
 ZGDC30  
**Temperature:**  
 293.16  
**Number of Scans:**  
 40

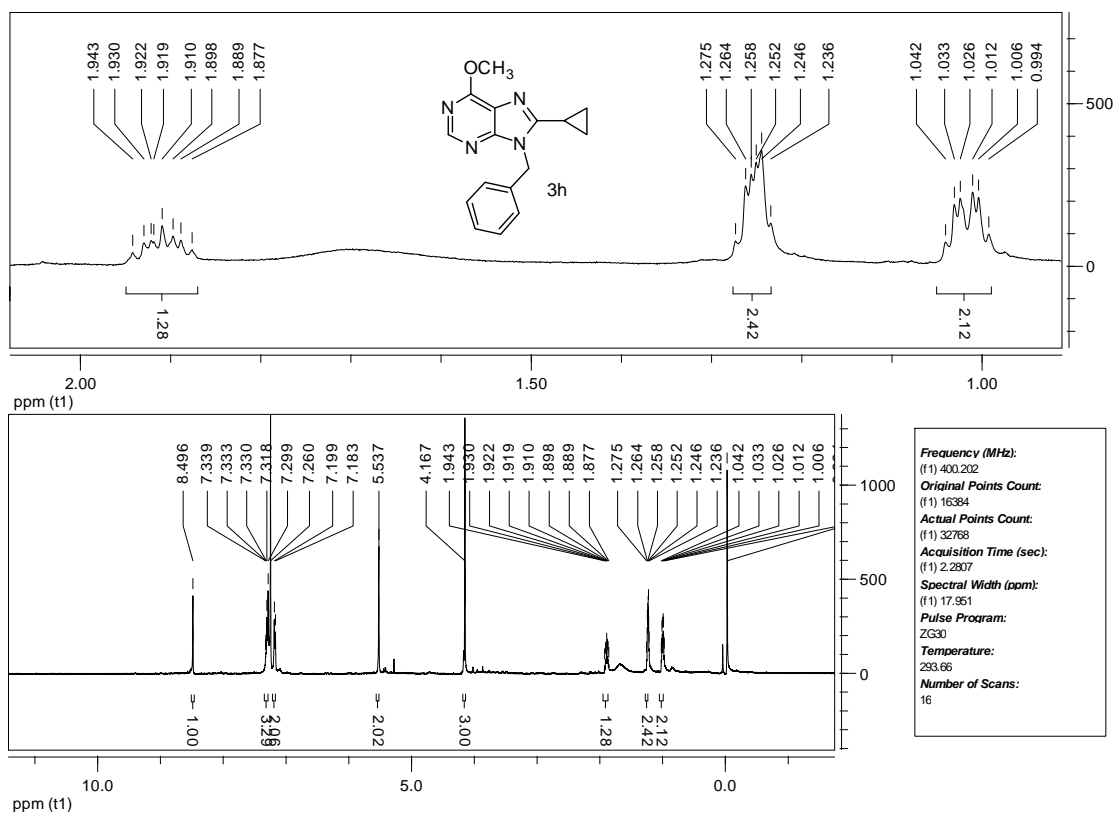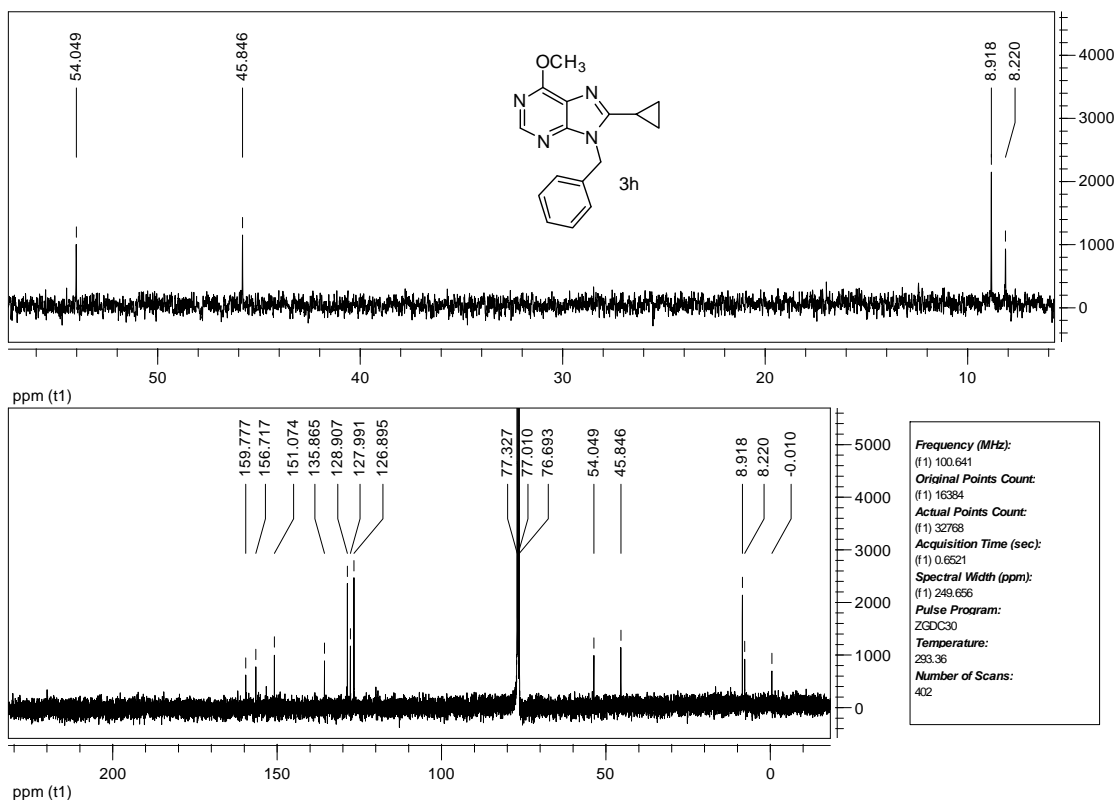

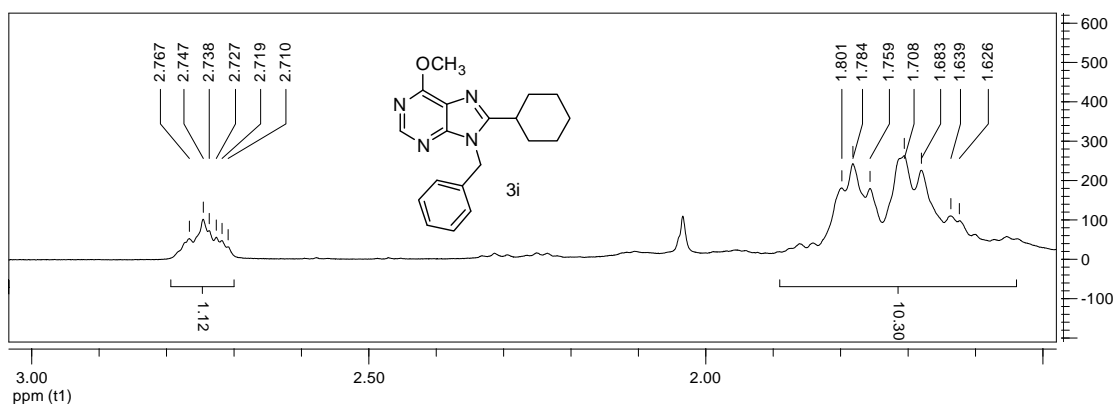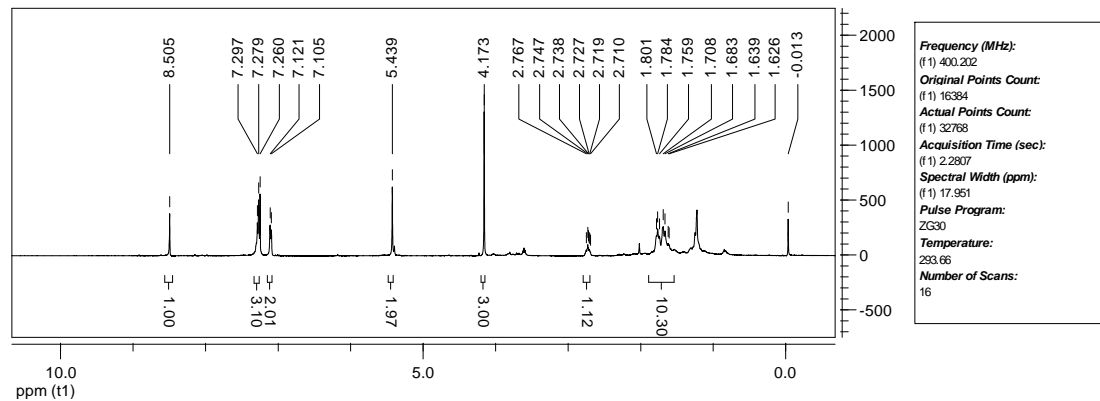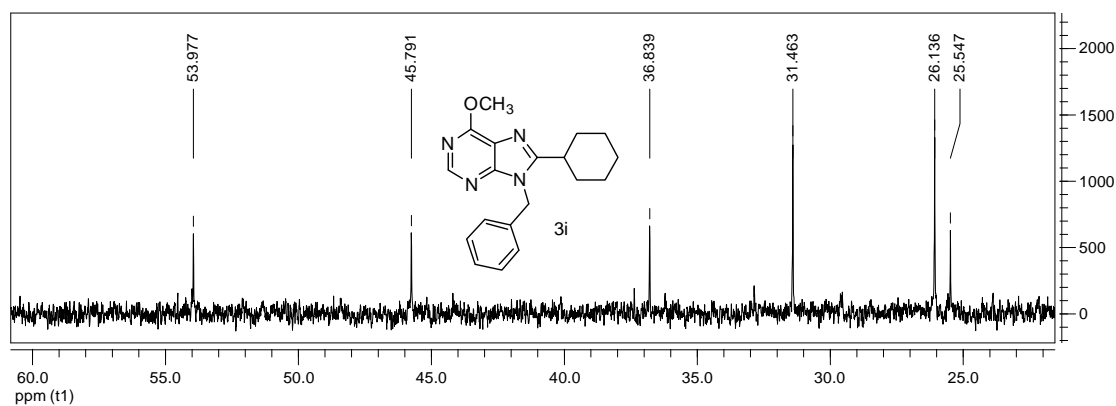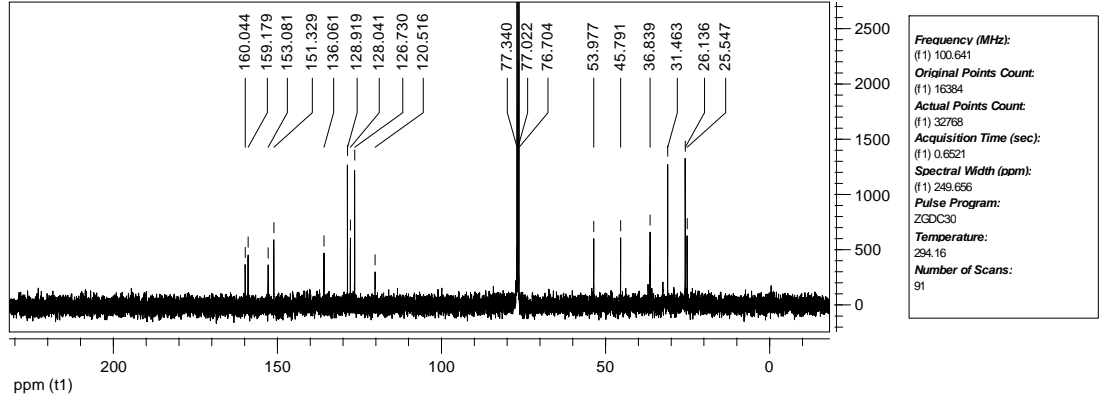



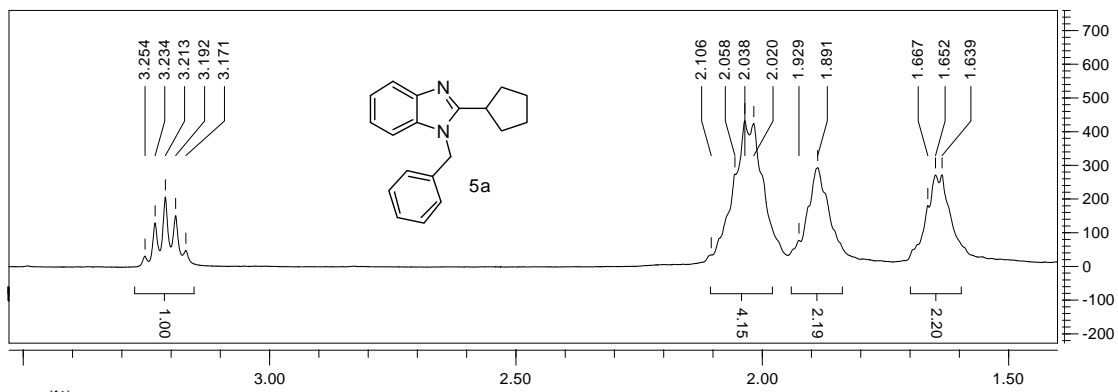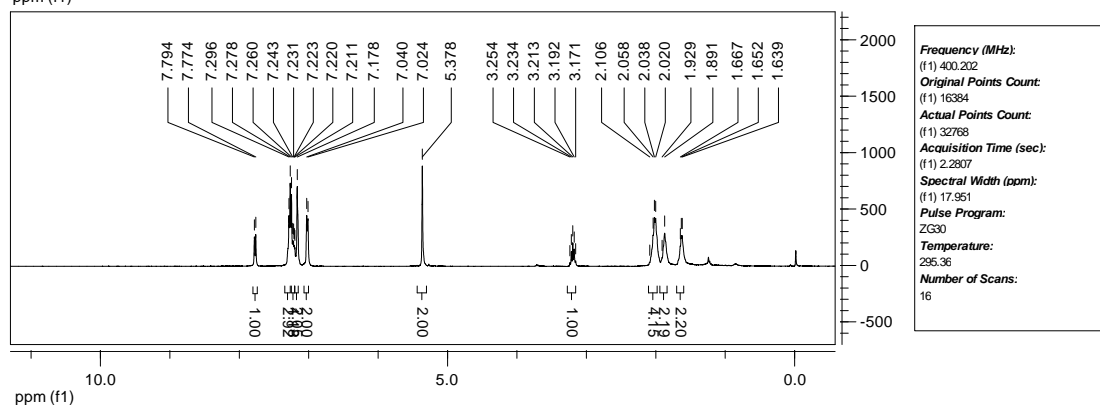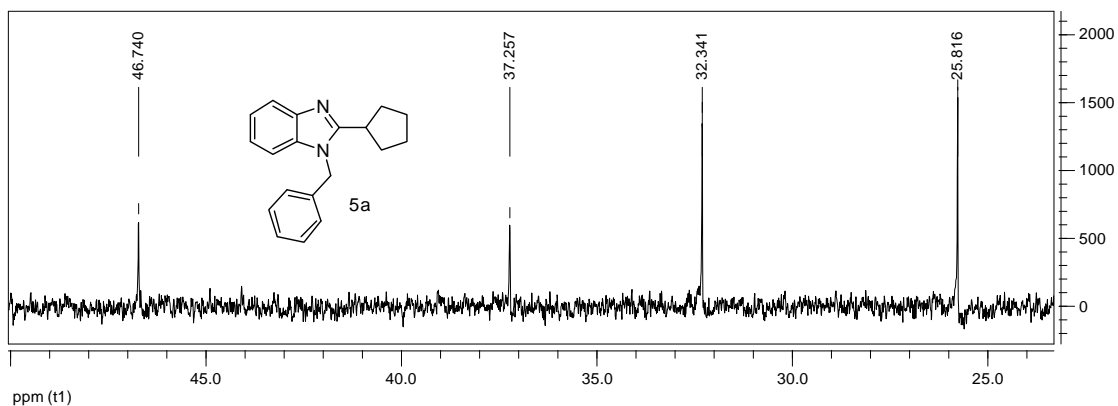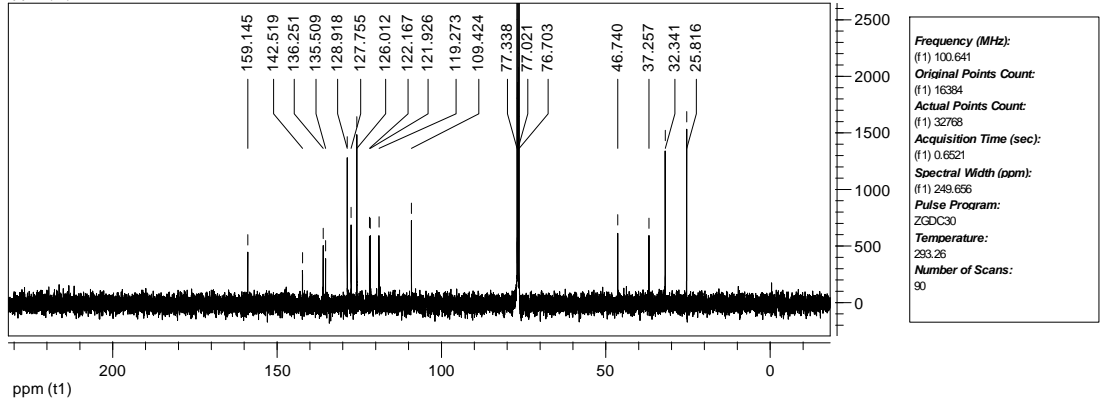



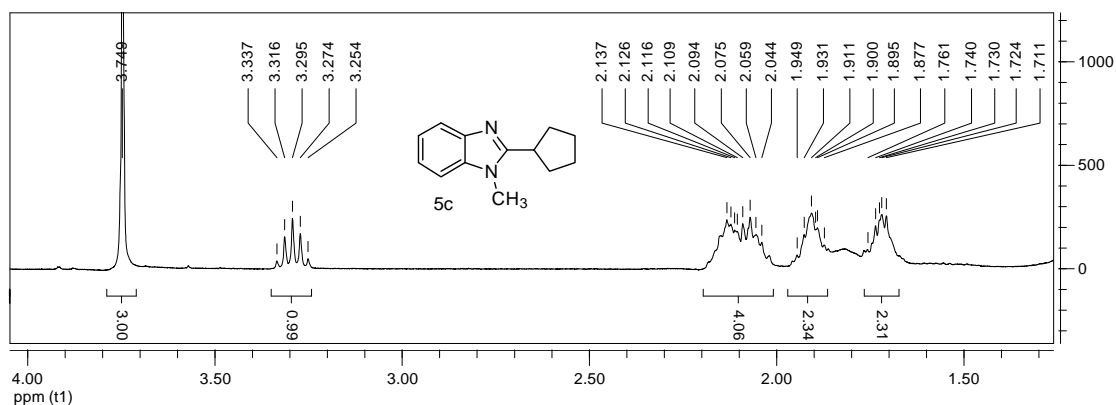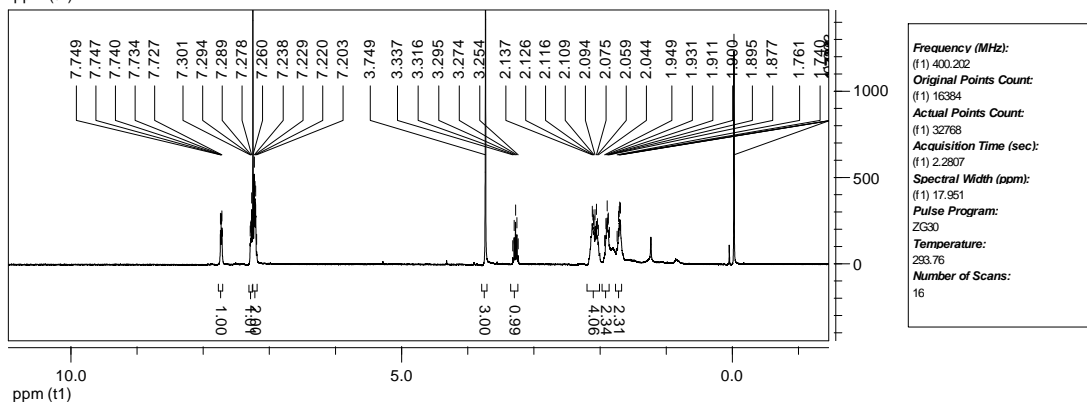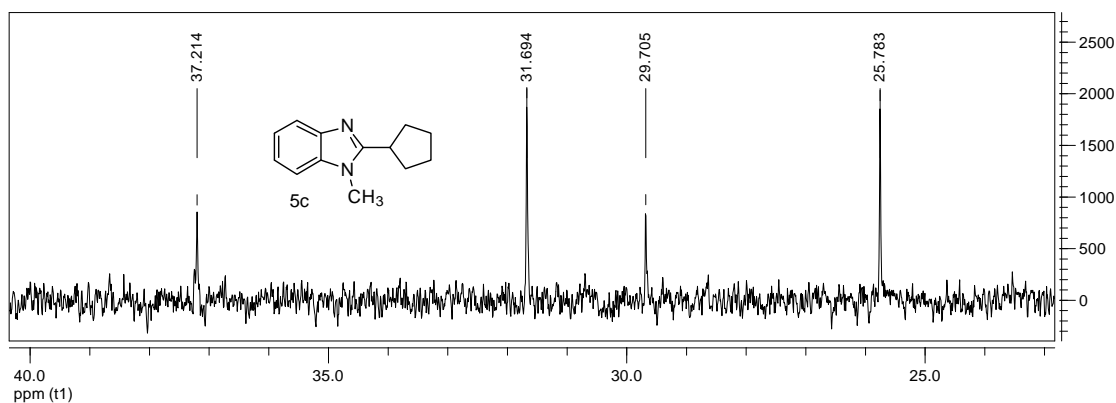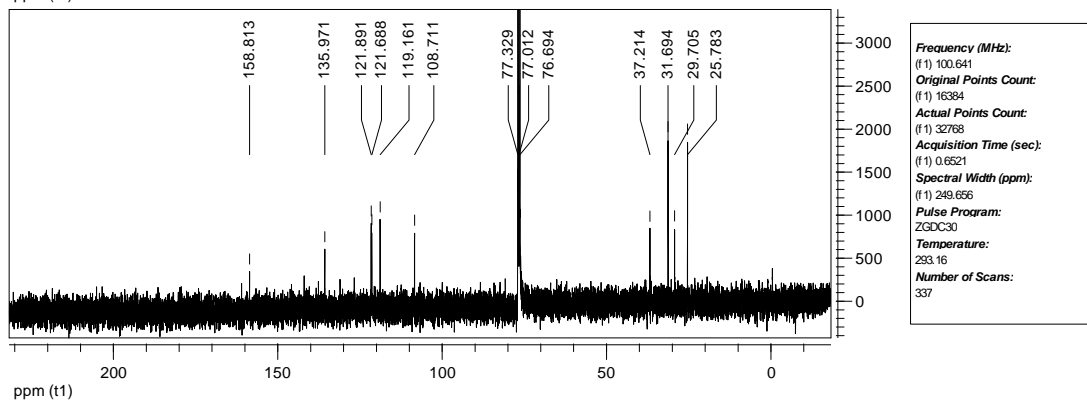

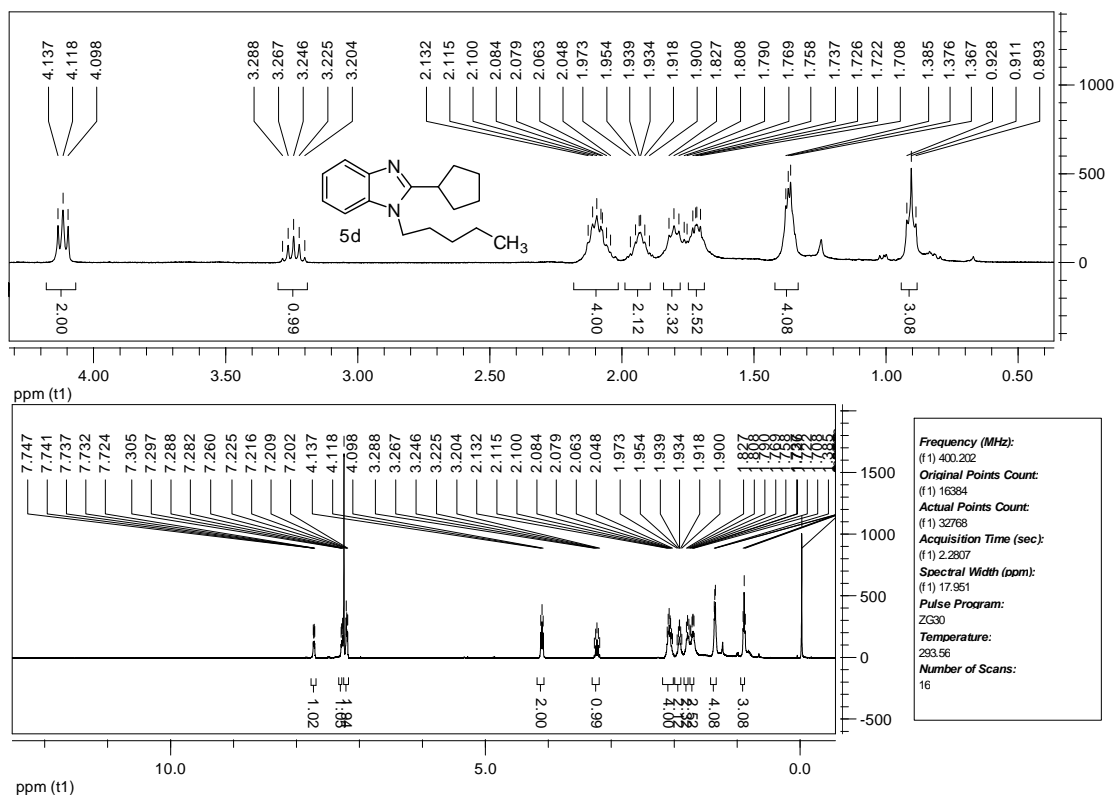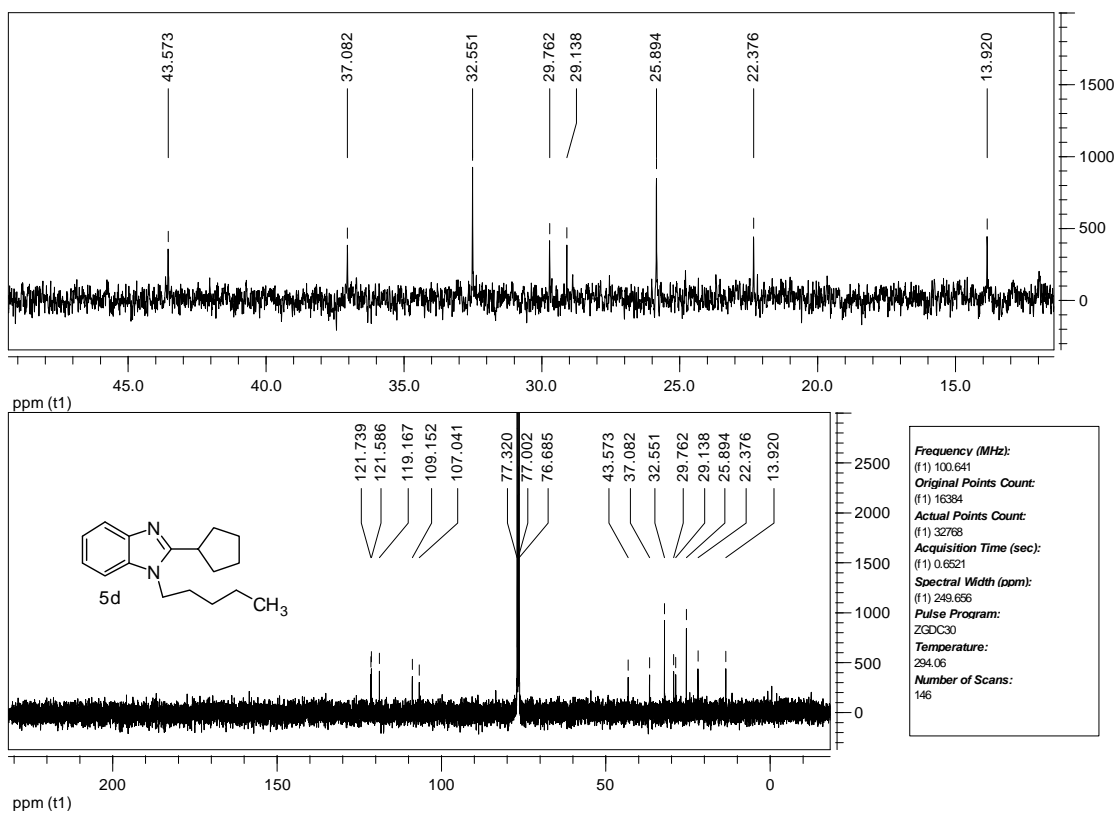



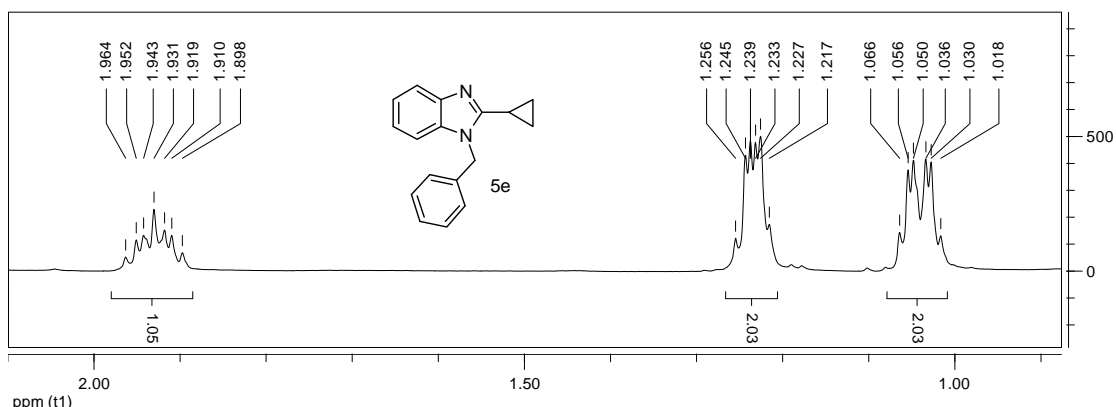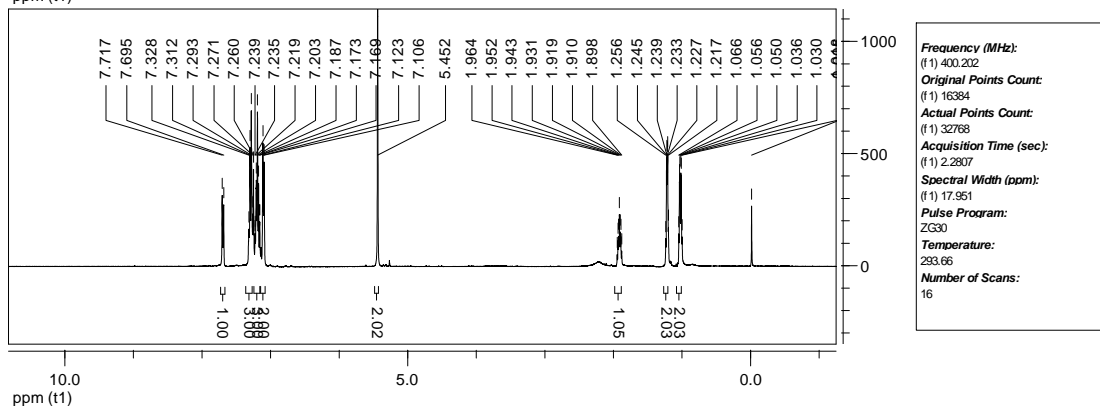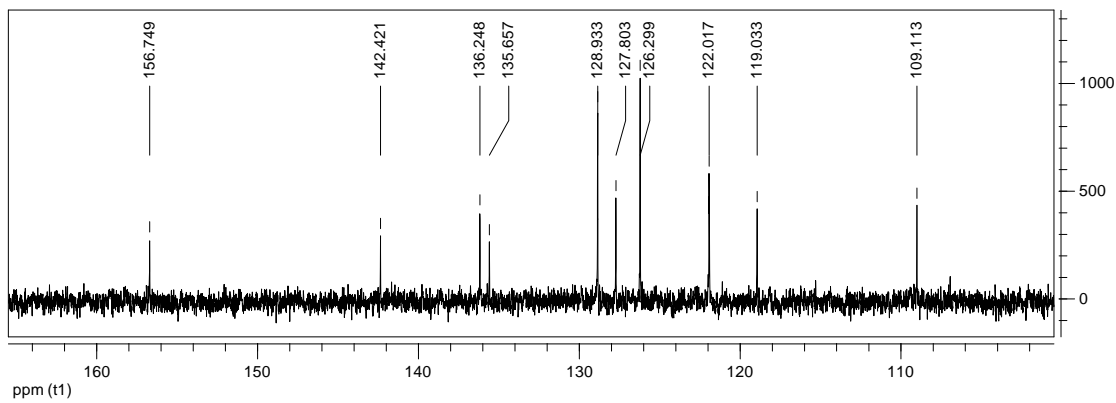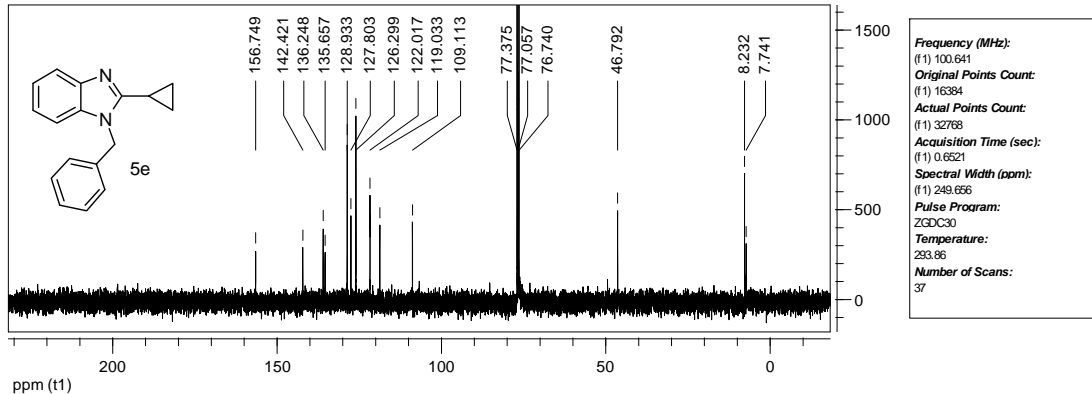

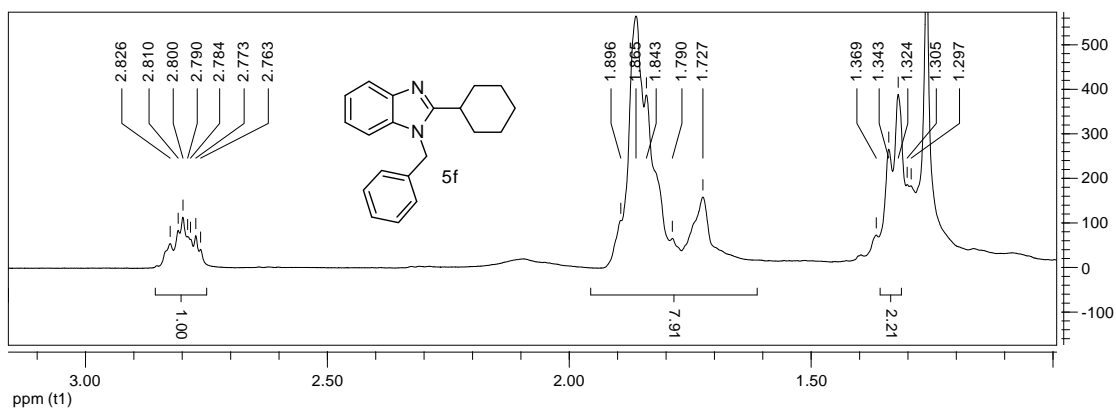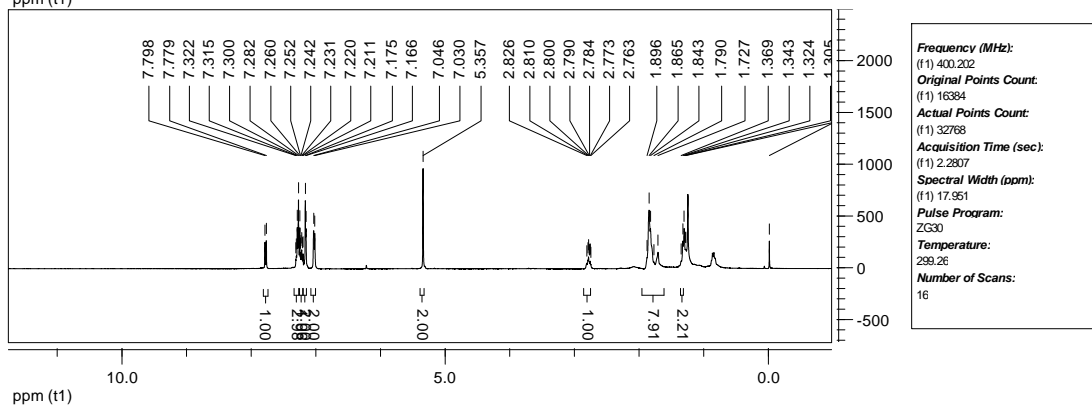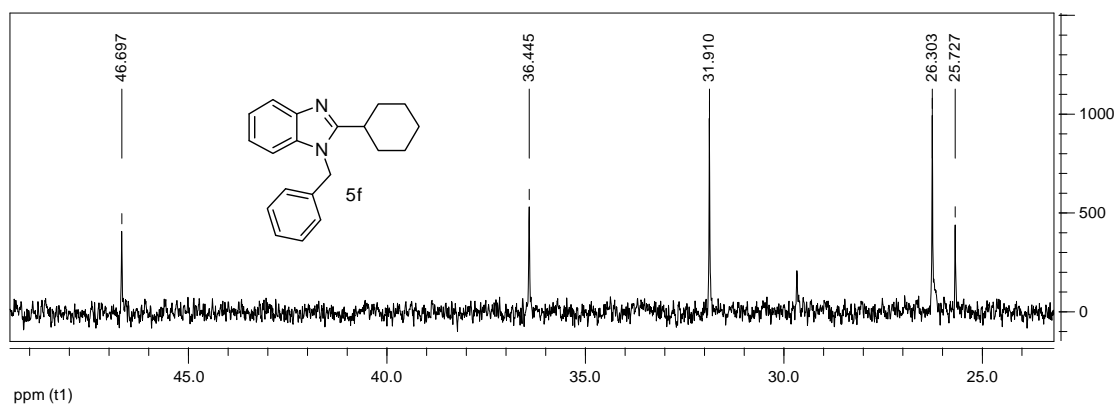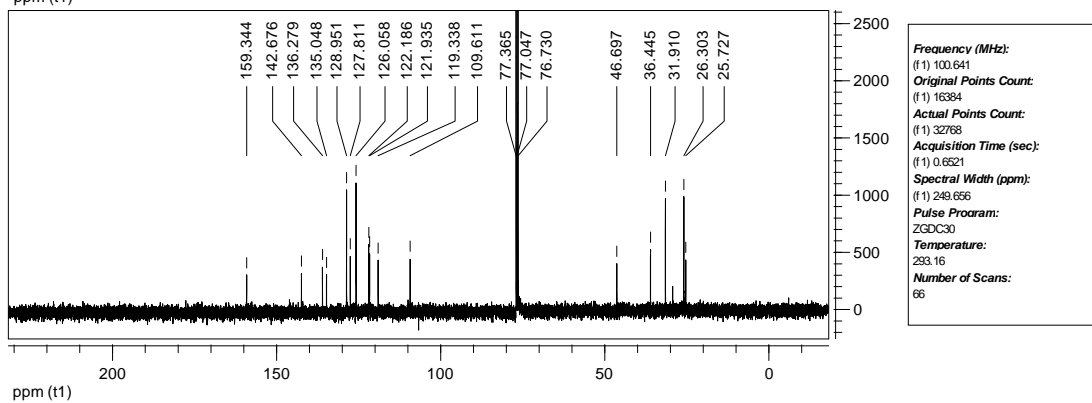

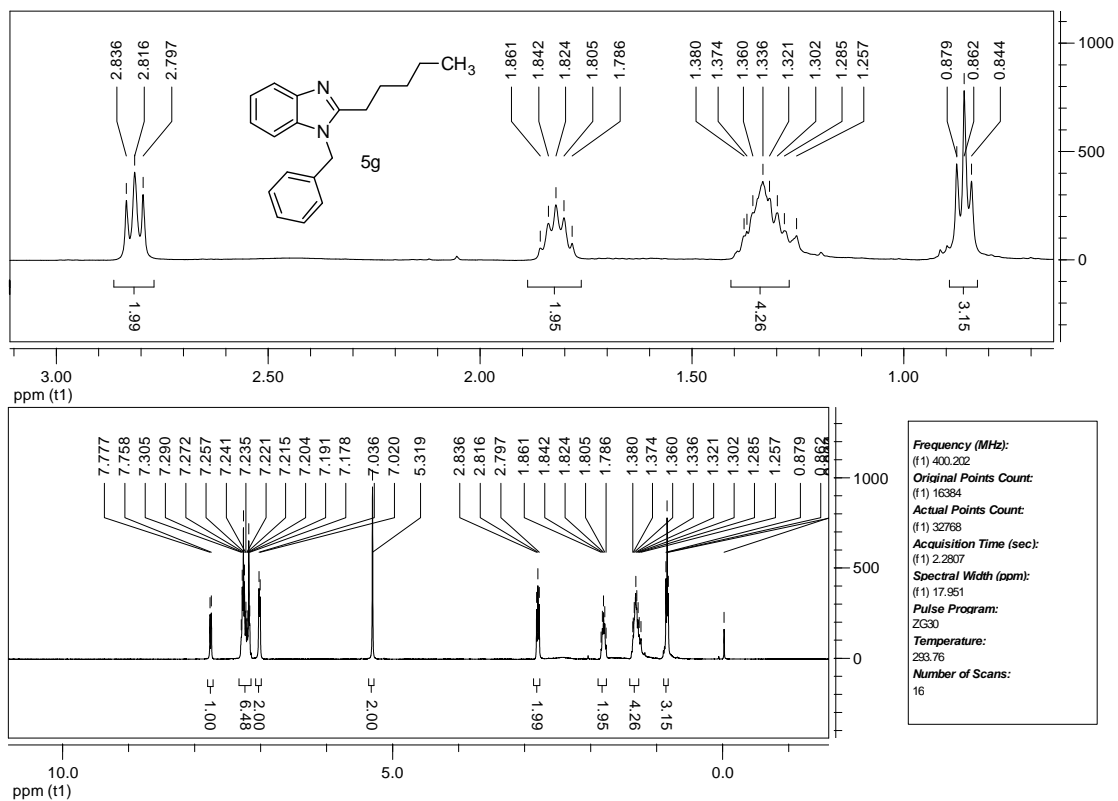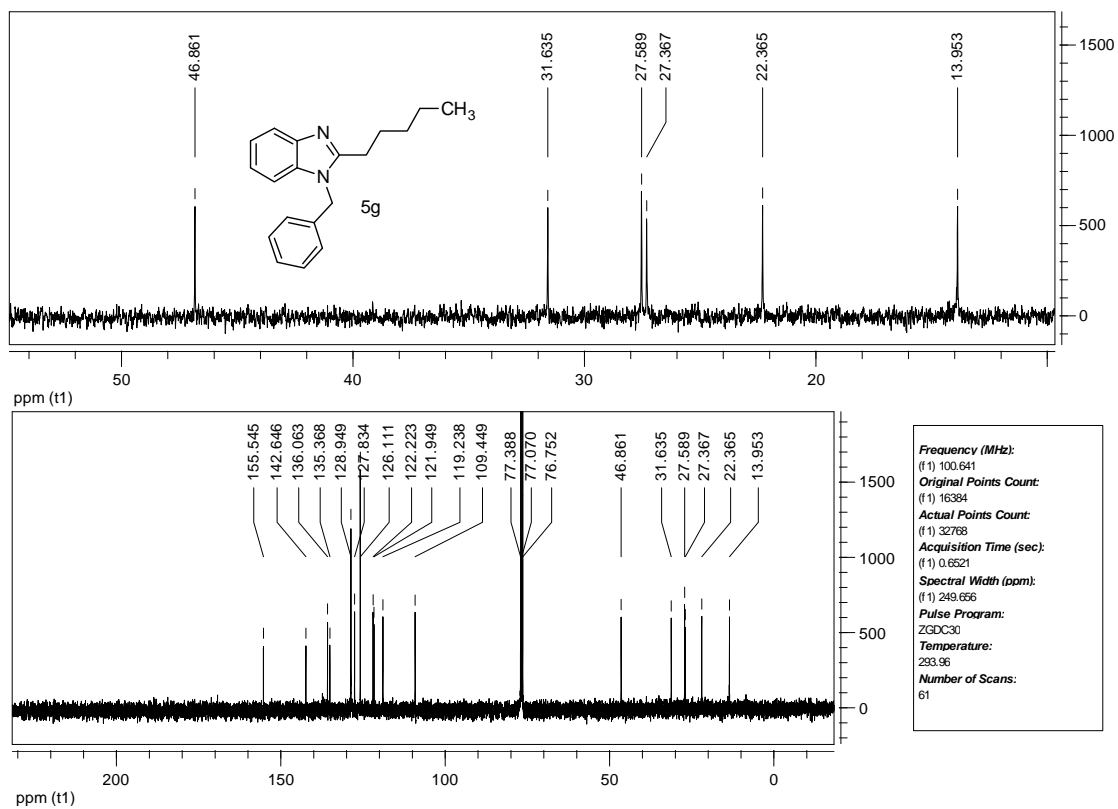

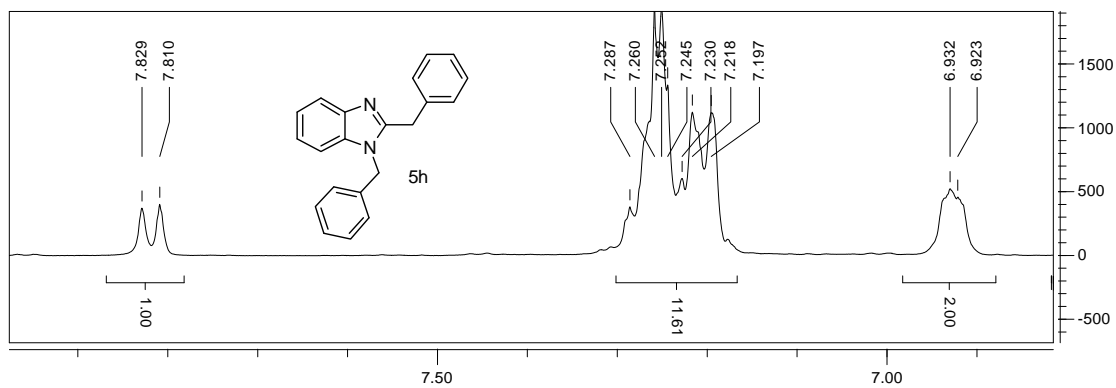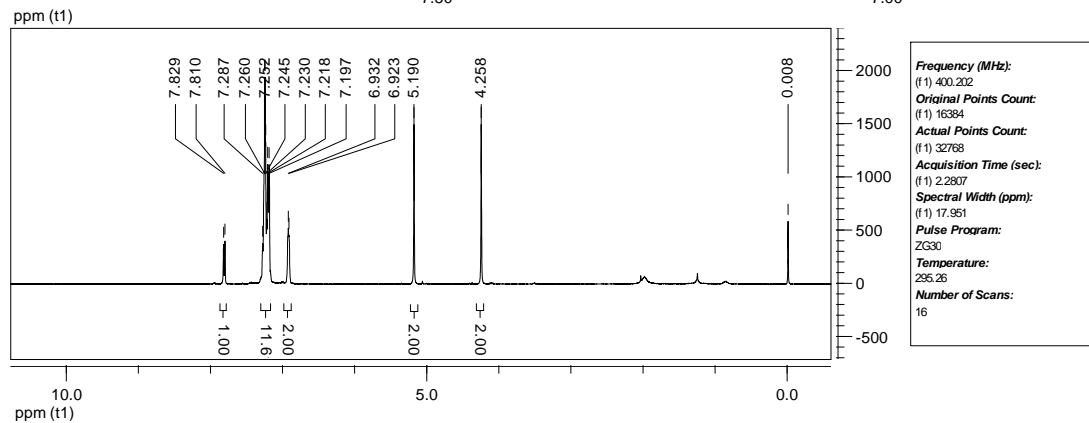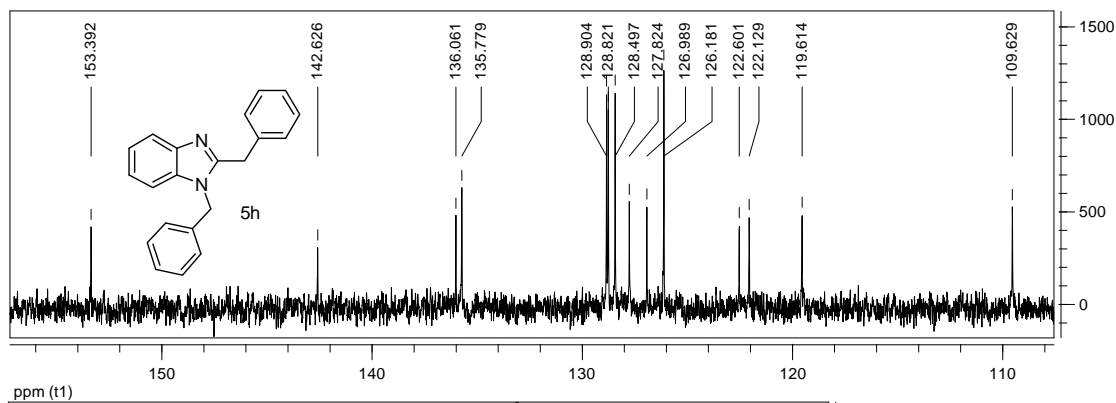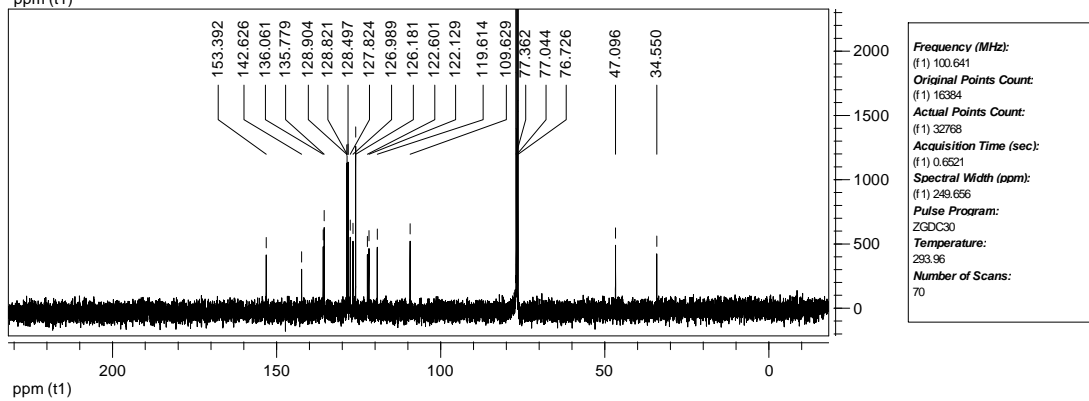

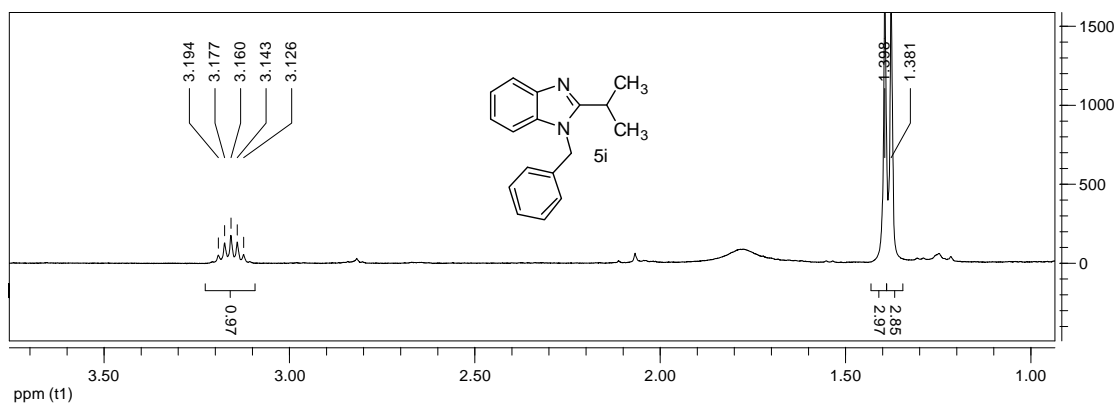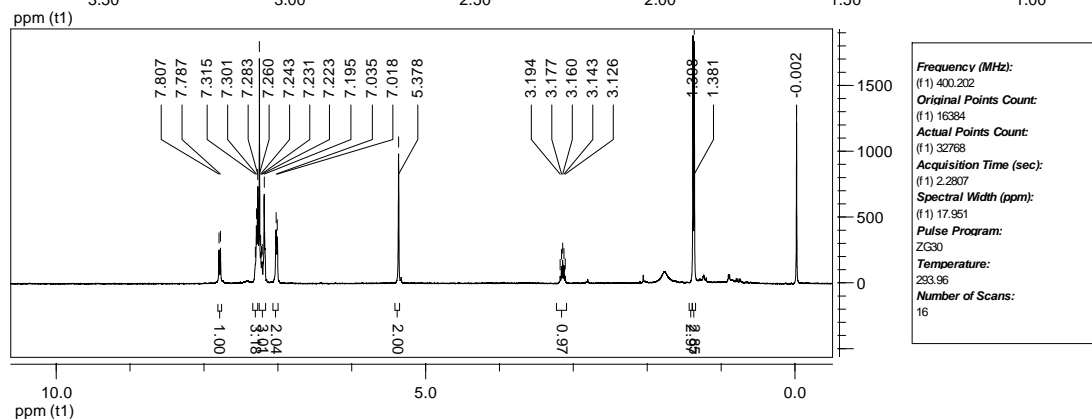

**Frequency (MHz):**  
 (f1) 400.202  
**Original Points Count:**  
 (f1) 16384  
**Actual Points Count:**  
 (f1) 32768  
**Acquisition Time (sec):**  
 (f1) 2.2807  
**Spectral Width (ppm):**  
 (f1) 17.951  
**Pulse Program:**  
 ZG30  
**Temperature:**  
 293.96  
**Number of Scans:**  
 16

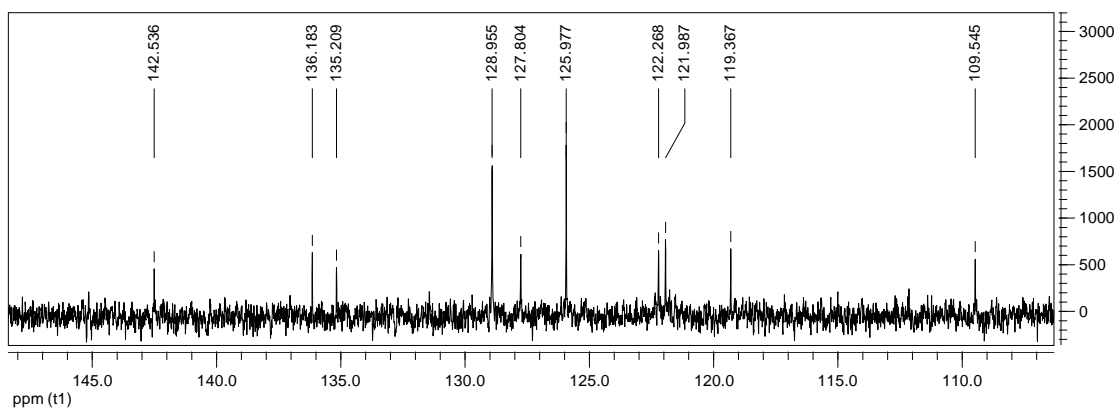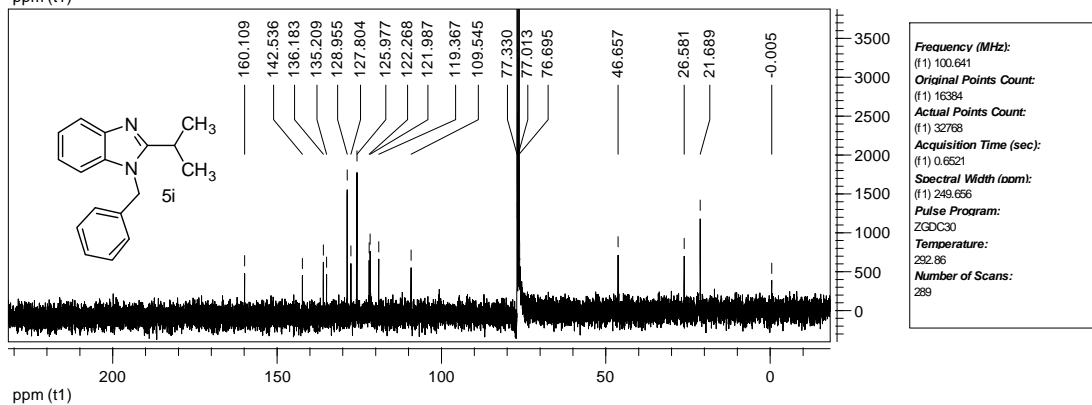

**Frequency (MHz):**  
 (f1) 100.641  
**Original Points Count:**  
 (f1) 16384  
**Actual Points Count:**  
 (f1) 32768  
**Acquisition Time (sec):**  
 (f1) 0.6521  
**Spectral Width (ppm):**  
 (f1) 249.656  
**Pulse Program:**  
 ZGDC30  
**Temperature:**  
 292.86  
**Number of Scans:**  
 299

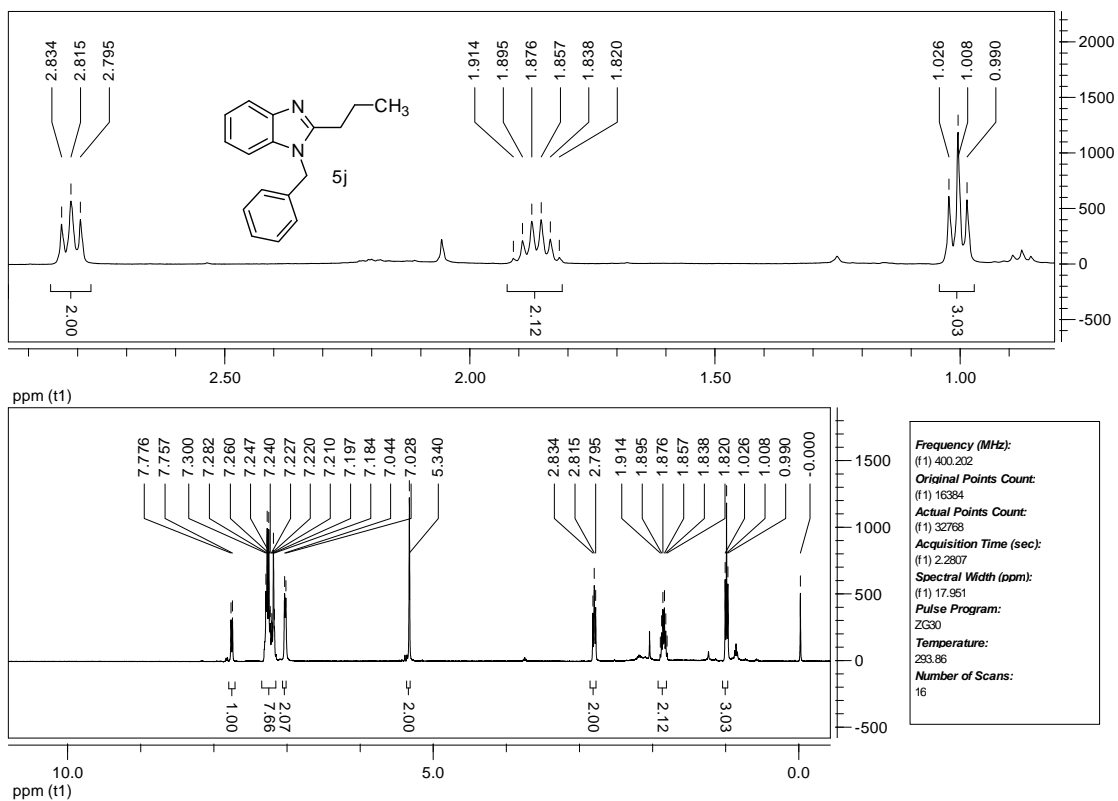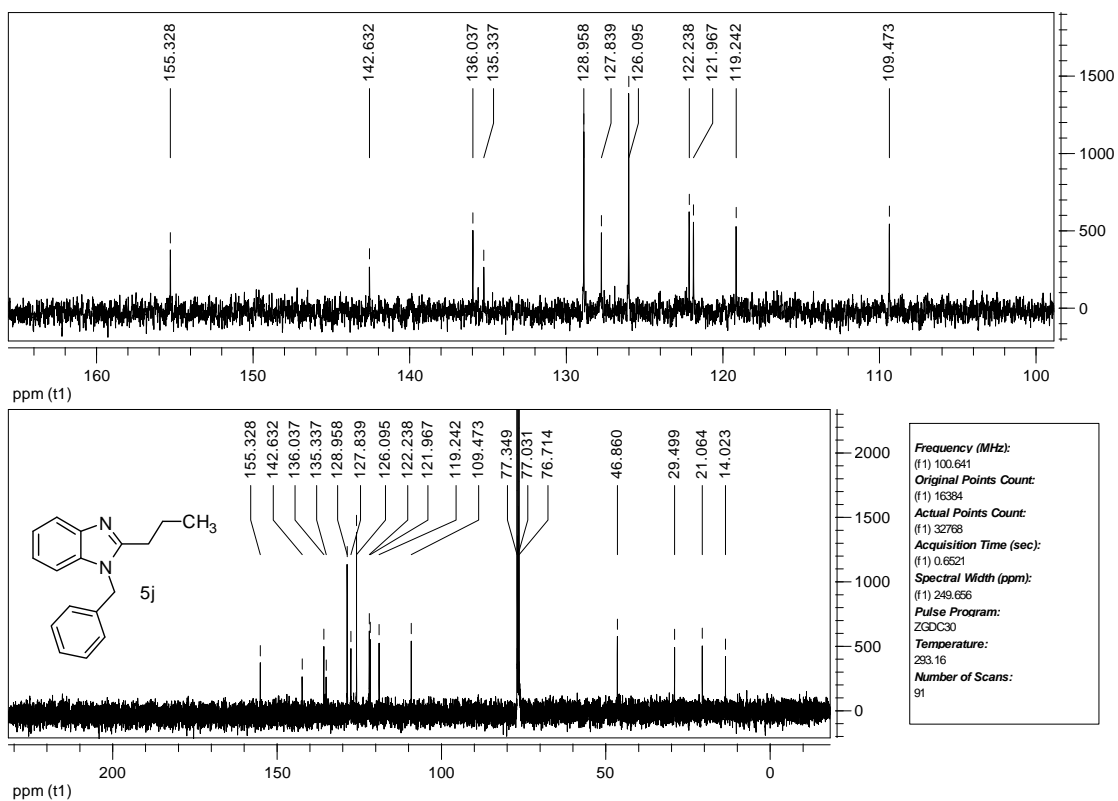

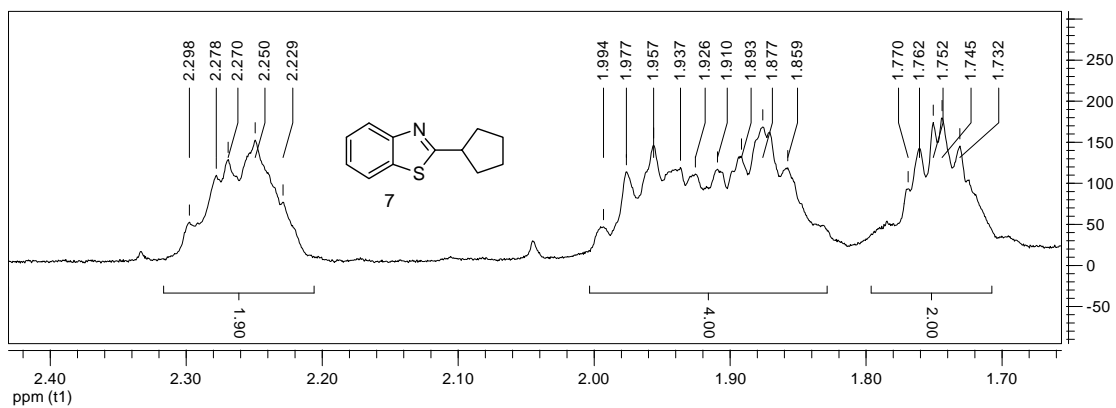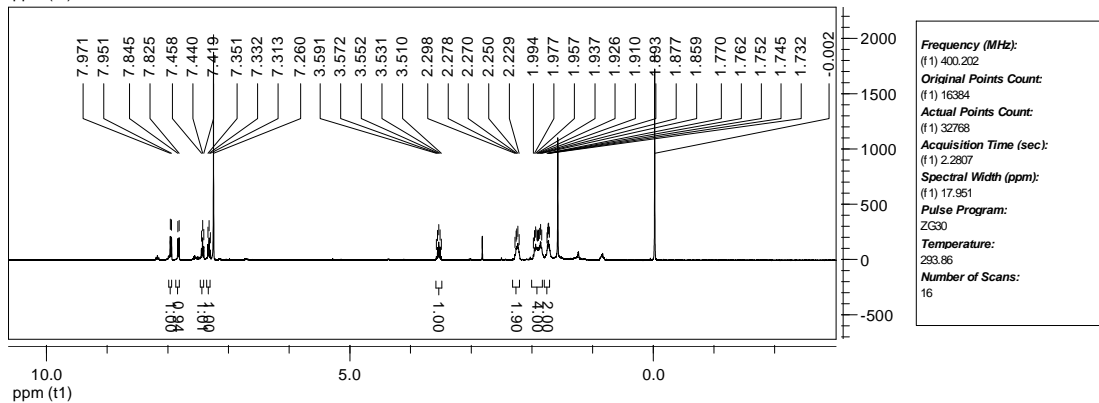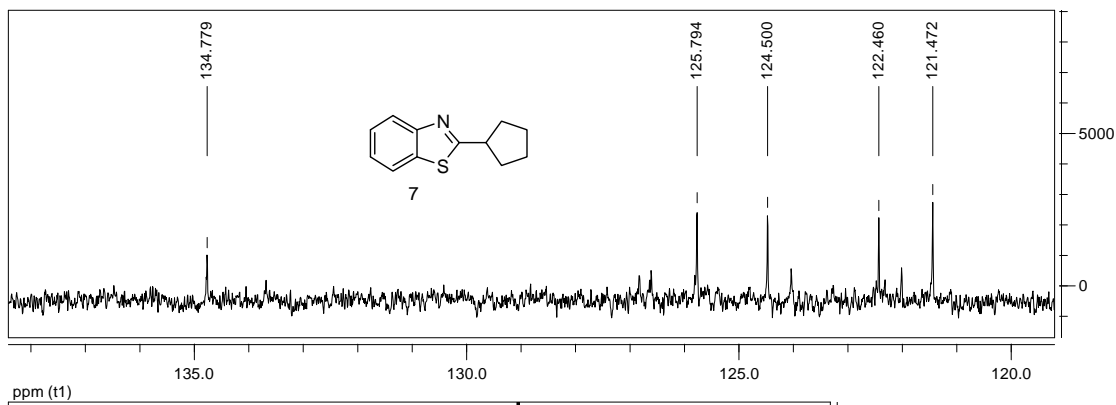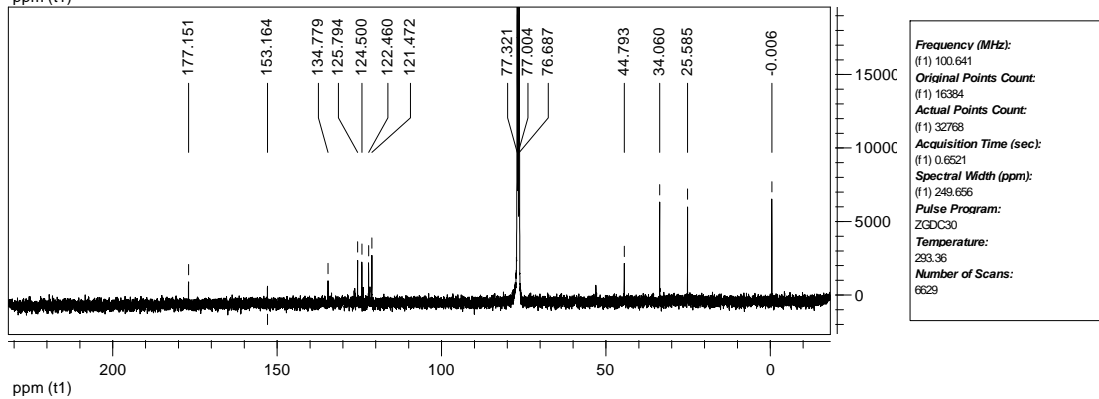

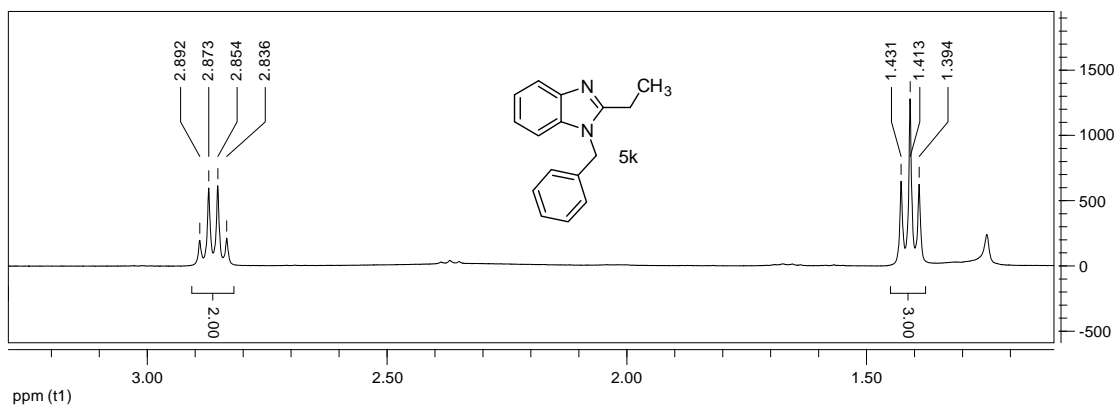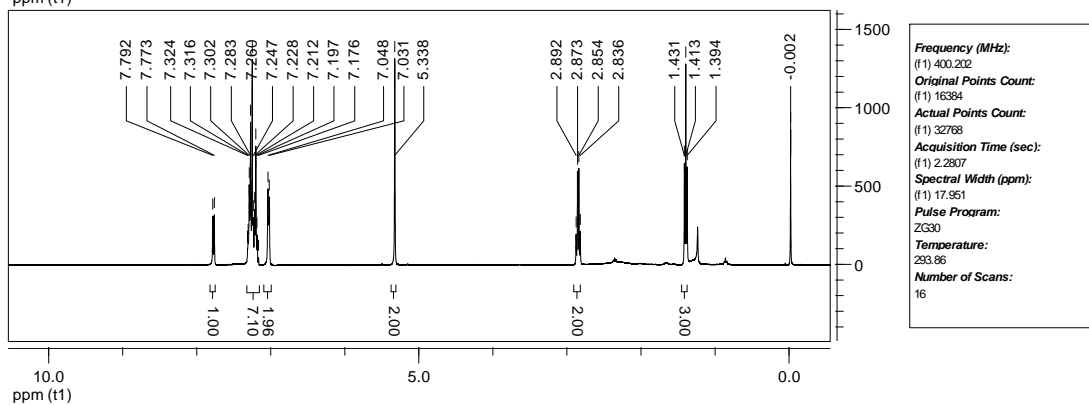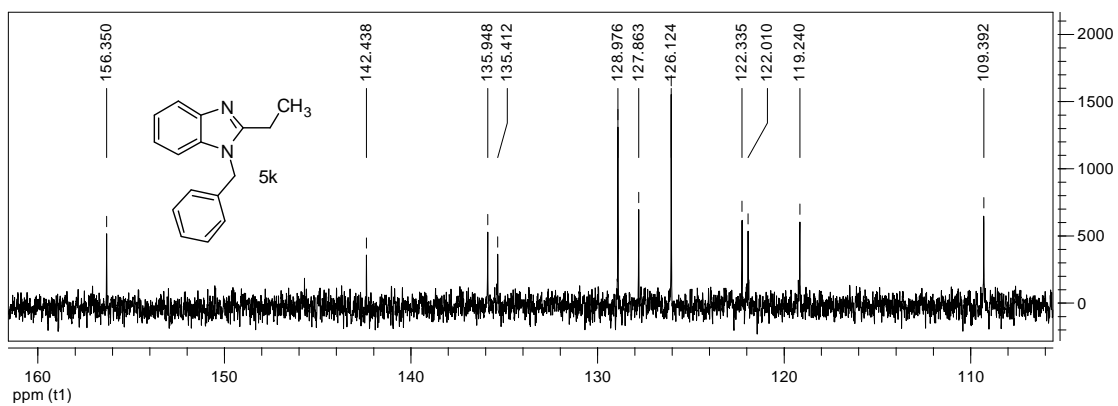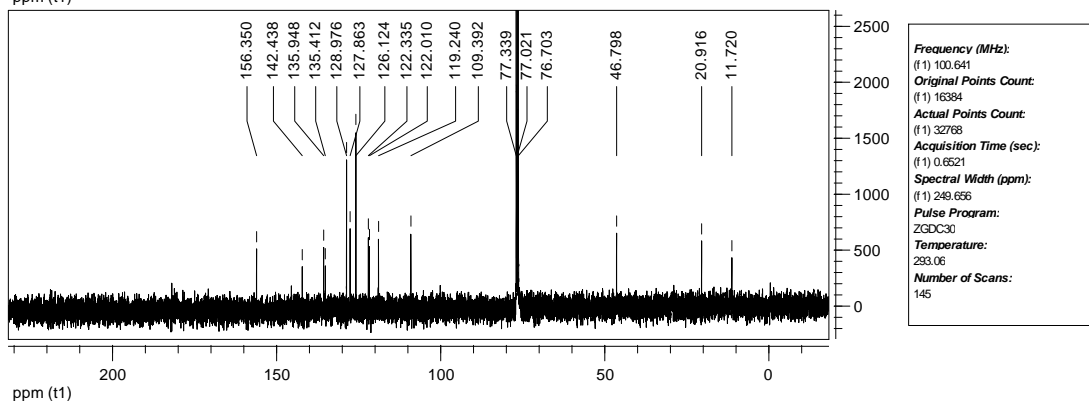

Supplement: c2cc32396f.pdf [file c2cc32396f.pdf]
